# Supplementary material
Source: PubMed Central journal article supplement (PMC3675924)
Supplement: AEM.00240-13_zam999104421so1.pdf [file AEM.00240-13_zam999104421so1.pdf]

## SUPPLEMENTAL MATERIAL

The following supplemental material is available online:

### SUPPLEMENTAL TEXT

**GOHTAM and BLAST analyses.**

### SUPPLEMENTAL TABLES

**Table S1** General features of reported esterases/lipases isolated from metagenomic resources.

Data are based on bibliographic records that are specifically cited.

**Table S2** List of primers used in the study.

**Table S3** Percentage of identity between Arreo enzymes, determined by Matcher (EMBOSS package). Matches/alignment lengths (% identity) are specifically shown.

**Table S4** Half-saturation (Michaelis) coefficient ( $K_m$ ), the catalytic rate constant ( $k_{cat}$ ) and the catalytic efficiency ( $k_{cat}/K_m$ ) values for the wild-type  $\alpha/\beta$  hydrolases from Lake Arreo. Kinetic parameters were calculated at 30°C as outlined in Table 1 and Materials and Method section in 96-well microtiter plate where each well contained 0.388-0.882  $\mu$ M enzyme solution and 0-100 mM substrate. For kinetic parameters determinations (performed in triplicate) a conventional Lineweaver and Burk model was used. Standard deviations (SD) are given.

### SUPPLEMENTAL FIGURES

**FIG S1** Location map (a), vegetation and use of drainage basin (b) and bathymetric map (c) of Lake Arreo. Sampling point is indicated by an asterict. The map has been generated based on batimetric studies previously published (ref. 13 and 52 in main text). Location map in (a) was made with the Geographic data sets found on the ESRI Data&Maps Kit of the SIG ArcGis 9.2 software. The limit of the drainage basin in (b) was established based on 1:25.000 maps of the digital cartographic base from the National Geographic Institute (*Instituto Geográfico Nacional de España*). The information was analyzed using the ArcGis 9.2 software. The correct establishment of the limit was further validated based on in situ measurements using topographic-geographic instrumentations (the digital free access information is available at the following URL “<http://centrodedescargas.cnig.es/CentroDescargas>”, as established in the *Orden FOM/956/2008*, dated on 31<sup>th</sup> March 2008 [BOE 8<sup>th</sup> April 2008]). The vegetation map was generated based on the photo-interpretation of the orthophotos "PNOA © *Instituto Geográfico Nacional de España – Basque Country (Gobierno Vasco)*". The correct assignation of the vegetation units was established based on in situ visit to the studied area. To perform the bathymetric map (c) of Lake Arreo, an aerial photo obtained by *Diputación Foral de Álava* (1992) was used. The field study was performed in 1994, using a boat with electric engine and an ecosonda Furuno FE-4300 or a surveying rod. The obtained values were referenced and digitally treated using specific software (ArcGis v9.2 and Surfer v7.00). Further modifications and validations were done based on up-dated ortho-images.

**FIG S2** Lake Arreo proteins, as overexpressed in the active form in *E. coli* at 16°C. A Coomassie-stained SDS-PAGE gel showing the expression level of the Lake Arreo proteins is shown. As shown, a high percentage of protein is produced in a soluble form, which resulted in

a purity higher than 98% after a single His<sub>6</sub>-tag purification step. Abbreviation: MW, molecular weight marker.

**FIG S3** Chemical structures of substrates applied for activity profiling of esterases/lipases preparations used in the present study. Note: ethyl 2-methylacetoacetate, ethyl 4-chloroacetoacetate, ethyl (R)-(-)-3-hydroxybutyrate, ethyl propionate, ethyl acetate, ethyl hexanoate, ethyl 2-chloropropionate, ethyl caprate, ethyl 4-hydroxy-3-methoxycinnamate, methyl propionate, methyl 2,2-dimethyl-3-hydroxypropionate, methyl (S)-(+)-3-hydroxybutyrate, methyl (R)-(+)-3-bromo-2-methylpropionate, (-)-methyl L-lactate, (+)-methyl D-lactate, methyl 4-(hydroxymethyl)benzoate, methyl pyruvate, methyl acetoacetate, methyl 2-hydroxyisobutyrate, methyl (S)-(+)-3-hydroxy-2-methylpropionate, tert-butyl 3-hydroxypropionate, isobutyl acetate, vinyl pivalate, vinyl methacrylate, vinyl crotonate, vinyl acetate, vinyl propionate, vinyl laurate, vinyl butyrate, glycine ethyl ester, (1S)-(+)-menthyl acetate, (1R)-(-)-menthyl acetate, (1S)-(+)-neomenthyl acetate, (1R)-(-)-neomenthyl acetate, were not used as substrates by any of the enzymes.

**FIG S4 Structural models of esterases/lipases from the  $\alpha/\beta$  hydrolase family characterised in this work.** Residues belonging to the catalytic core are explicitly shown as follows: LAE1 (A), LAE2 (B), LAE3 (C), LAE4 (D), LAE5 (E), LAE6 (F), and LAE7 (G).

## ANNEX

### Nucleotide and amino acid sequences of esterases/lipases from Lake Arreo.

## SUPPLEMENTAL TEXT

**GOHTAM and BLAST analyses.** Compositional similarity between the metagenomic fragments and the sequences of related bacterial chromosomes and plasmids was analyzed by the comparison of frequencies of tetranucleotides in DNA sequences using GOHTAM tool and protein blast of contig encoded proteins, the results of which are given below.

The tree of contigs by pattern similarity is shown below:

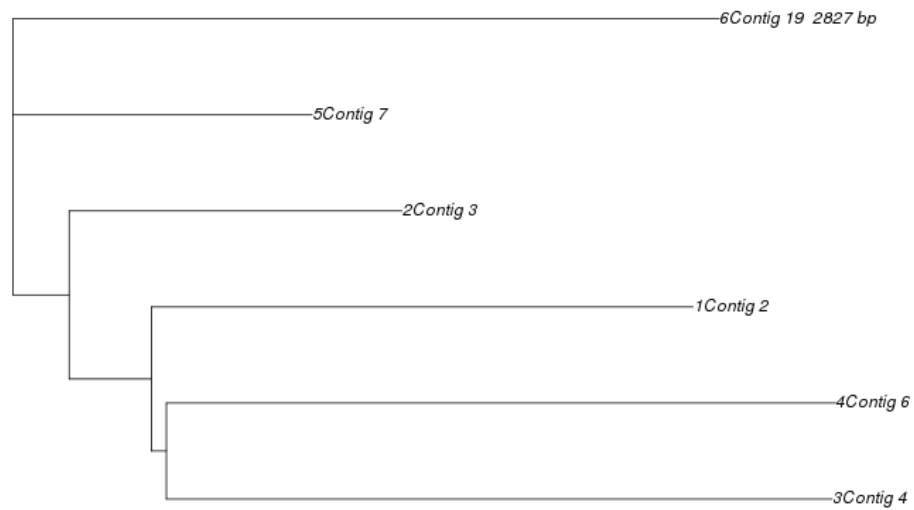

## Analysis of DNA fragment (contig 2) containing LAE1 and LAE2 enzymes

| fasta 1 (length:43348)<br>Contig 2 (43348 bp) |      |                                                |        |                       |         |          |            |            |  |
|-----------------------------------------------|------|------------------------------------------------|--------|-----------------------|---------|----------|------------|------------|--|
| Distance (A.U.Euclidean)                      | rRNA | Subject                                        | Strain | Reference length (pb) | Origin  | Taxonomy | similarity | confidence |  |
| 102                                           | no   | <a href="#">Cupriavidus metallidurans CH34</a> | GI     | 3928089               | genomic | Bacteria | 4/5        | 4.5/5      |  |
| 104                                           | no   | <a href="#">Ralstonia eutropha JMP134</a>      | GI     | 6532686               | genomic | Bacteria | 4/5        | 4.5/5      |  |
| 106                                           | no   | <a href="#">Acidovorax sp. KKS102</a>          | GI     | 68689                 | genomic | Bacteria | 4/5        | 4.5/5      |  |
| 107                                           | no   | <a href="#">Ralstonia syzygii R24</a>          | GI     | 5420219               | genomic | Bacteria | 4/5        | 4.5/5      |  |
| 110                                           | no   | <a href="#">Cupriavidus metallidurans CH34</a> | GI     | 2580084               | plasmid | Bacteria | 4/5        | 4.5/5      |  |
| 111                                           | no   | <a href="#">Ralstonia solanacearum PSI07</a>   | GI     | 2085000               | plasmid | Bacteria | 4/5        | 4.5/5      |  |
| 111                                           | no   | <a href="#">Delftia sp. AN3</a>                | GI     | 31303                 | genomic | Bacteria | 4/5        | 4.5/5      |  |
| 113                                           | no   | <a href="#">Burkholderia sp. JS667</a>         | GI     | 30597                 | genomic | Bacteria | 4/5        | 4.5/5      |  |
| 114                                           | no   | <a href="#">Cupriavidus necator N-1</a>        | GI     | 424140                | plasmid | Bacteria | 4/5        | 4.5/5      |  |
| 116                                           | no   | <a href="#">Ralstonia phage phiRSA1</a>        | GI     | 38760                 | genomic | Viruses  | 4/5        | 4.5/5      |  |

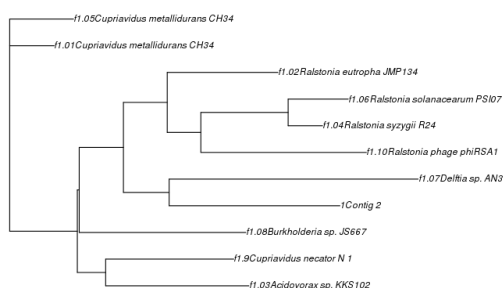

## Protein blast hits against plasmid proteins

| Number of hits | Subject plasmid                                                  |
|----------------|------------------------------------------------------------------|
| 18             | <i>Arthrobacter aureescens</i> TC1 plasmid TC2 [NC_008713]       |
| 14             | <i>Shewanella baltica</i> OS155 plasmid pSbal01 [NC_009035]      |
| 11             | <i>Synechococcus</i> sp. PCC 7002 plasmid pAQ7 [NC_010474]       |
| 10             | <i>Erwinia billingiae</i> Eb661 plasmid pEB170 [NC_014305]       |
| 10             | <i>Mesorhizobium</i> sp. BNC1 plasmid 2 [NC_008243]              |
| 10             | <i>Agrobacterium radiobacter</i> K84 plasmid pAtK84c [NC_011987] |

## Significant protein blast hit:

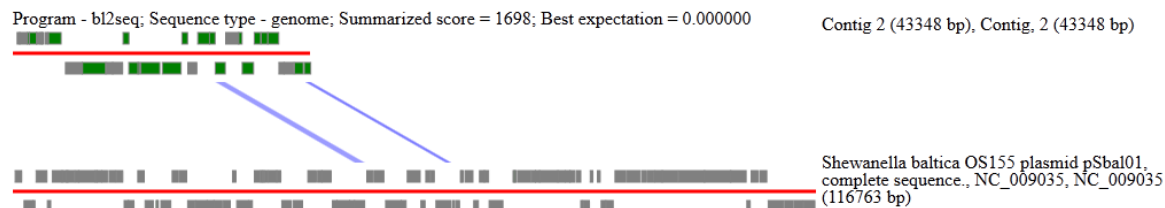

## Analysis of DNA fragment (contig 3) containing LAE3 enzyme

| fasta 2 (length:39476)<br>Contig 3 (39476 bp) |      |                                                       |        |                       |         |          |            |            |
|-----------------------------------------------|------|-------------------------------------------------------|--------|-----------------------|---------|----------|------------|------------|
| Distance (A.U.Euclidean)                      | rRNA | Subject                                               | Strain | Reference length (pb) | Origin  | Taxonomy | similarity | confidence |
| 121                                           | no   | <a href="#">Methylobacterium extorquens DM4</a>       | GI     | 141504                | plasmid | Bacteria | 3/5        | 4.5/5      |
| 124                                           | no   | <a href="#">Sinorhizobium fredii NGR234</a>           | GI     | 3925702               | genomic | Bacteria | 3/5        | 4.5/5      |
| 130                                           | no   | <a href="#">Methylobacterium chloromethanicum CM4</a> | GI     | 380207                | plasmid | Bacteria | 3/5        | 4.5/5      |
| 131                                           | no   | <a href="#">Xanthobacter autotrophicus Py2</a>        | GI     | 316164                | plasmid | Bacteria | 3/5        | 4.5/5      |
| 133                                           | no   | <a href="#">Pseudomonas denitrificans</a>             | GI     | 39000                 | genomic | Bacteria | 3/5        | 4.5/5      |
| 136                                           | no   | <a href="#">Mesorhizobium opportunistum WSM2075</a>   | GI     | 6884444               | genomic | Bacteria | 3/5        | 4.5/5      |
| 137                                           | no   | <a href="#">Rhodovulum sulfidophilum</a>              | GI     | 43978                 | genomic | Bacteria | 3/5        | 4.5/5      |
| 137                                           | no   | <a href="#">Sinorhizobium fredii NGR234</a>           | GI     | 2430033               | plasmid | Bacteria | 3/5        | 4.5/5      |
| 138                                           | no   | <a href="#">Sinorhizobium melloti 1021</a>            | GI     | 3654135               | genomic | Bacteria | 3/5        | 4.5/5      |
| 138                                           | no   | <a href="#">Mesorhizobium loti MAFF303099</a>         | GI     | 7036071               | genomic | Bacteria | 3/5        | 4.5/5      |

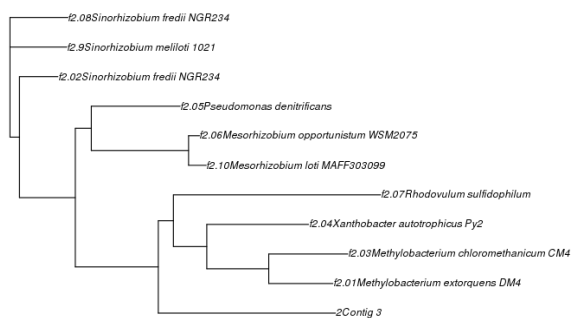

## Protein blast hits against plasmid proteins

| Number of hits | Subject plasmid                                           |
|----------------|-----------------------------------------------------------|
| 12             | <i>Nitrobacter hamburgensis</i> X14 plasmid 1 [NC_007959] |
| 7              | <i>Azospirillum</i> sp. B510 plasmid pAB510f [NC_013860]  |

## Analysis of DNA fragment (contig 4) containing LAE7

| fasta 3 (length:37941)<br>Contig 4 (37941 bp) |      |                                                       |        |                       |         |          |            |            |
|-----------------------------------------------|------|-------------------------------------------------------|--------|-----------------------|---------|----------|------------|------------|
| Distance (A.U.Euclidean)                      | rRNA | Subject                                               | Strain | Reference length (pb) | Origin  | Taxonomy | similarity | confidence |
| 116                                           | no   | <a href="#">Burkholderia phage Bcep22</a>             | GI     | 63879                 | genomic | Viruses  | 4/5        | 4.5/5      |
| 128                                           | no   | <a href="#">Burkholderia phage BcepL02</a>            | GI     | 62715                 | genomic | Viruses  | 3/5        | 4.5/5      |
| 134                                           | no   | <a href="#">Burkholderia sp. MSMB121</a>              | GI     | 27120                 | genomic | Bacteria | 3/5        | 4.5/5      |
| 136                                           | no   | <a href="#">Thiobacillus denitrificans ATCC 25259</a> | GI     | 2909809               | genomic | Bacteria | 3/5        | 4.5/5      |
| 137                                           | no   | <a href="#">Burkholderia sp. MSMB122</a>              | GI     | 26280                 | genomic | Bacteria | 3/5        | 4.5/5      |
| 138                                           | no   | <a href="#">Burkholderia phage BcepC6B</a>            | GI     | 42415                 | genomic | Viruses  | 3/5        | 4.5/5      |
| 144                                           | no   | <a href="#">Burkholderia phage phi52237</a>           | GI     | 37639                 | genomic | Viruses  | 3/5        | 4.5/5      |
| 145                                           | no   | <a href="#">Aromatoleum aromaticum EbN1</a>           | GI     | 4296230               | genomic | Bacteria | 3/5        | 4.5/5      |
| 145                                           | no   | <a href="#">Burkholderia phage KS5</a>                | GI     | 37236                 | genomic | Viruses  | 3/5        | 4.5/5      |
| 149                                           | no   | <a href="#">Burkholderia phage Bups phi1</a>          | GI     | 46216                 | genomic | Viruses  | 3/5        | 4.5/5      |

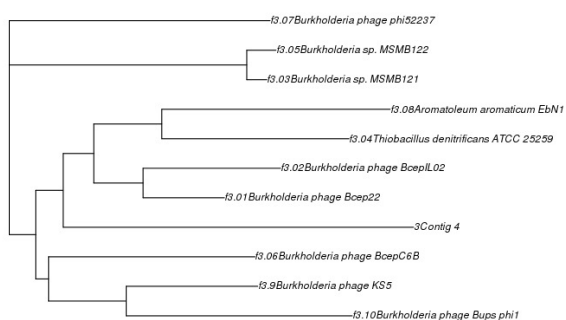

## Protein blast hits against plasmid proteins

| Number of hits | Subject plasmid                                                      |
|----------------|----------------------------------------------------------------------|
| 10             | <i>Mesorhizobium</i> sp. BNC1 plasmid 2 [NC_008243]                  |
| 8              | <i>Polaromonas naphthalenivorans</i> CJ2 plasmid pPNAP04 [NC_008760] |
| 8              | <i>Agrobacterium radiobacter</i> K84 plasmid pAtK84c [NC_011987]     |

## Significant protein blast hit:

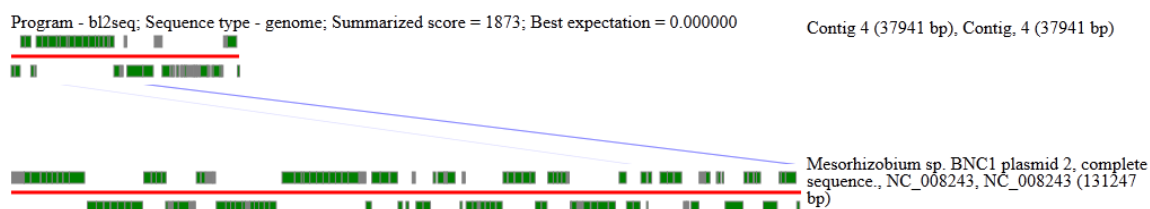

## Analysis of DNA fragment (contig 6) containing LAE4

| fasta 4 (length:37591)<br>Contig 6 (37591 bp) |      |                                                                |        |                       |         |          |            |            |  |
|-----------------------------------------------|------|----------------------------------------------------------------|--------|-----------------------|---------|----------|------------|------------|--|
| Distance (A.U.Euclidean)                      | rRNA | Subject                                                        | Strain | Reference length (pb) | Origin  | Taxonomy | similarity | confidence |  |
| 132                                           | no   | <a href="#">Sinorhizobium medicae WSM419</a>                   | GI     | 1245408               | plasmid | Bacteria | 3/5        | 4.5/5      |  |
| 132                                           | no   | <a href="#">Mesorhizobium loti MAFF303099</a>                  | GI     | 351911                | plasmid | Bacteria | 3/5        | 4.5/5      |  |
| 132                                           | no   | <a href="#">Sinorhizobium melloti 1021</a>                     | GI     | 1354226               | plasmid | Bacteria | 3/5        | 4.5/5      |  |
| 133                                           | no   | <a href="#">Rhizobium sp. TAL1145</a>                          | GI     | 19998                 | genomic | Bacteria | 3/5        | 4.5/5      |  |
| 134                                           | no   | <a href="#">Rhizobium leguminosarum bv. trifolii WSM1325</a>   | GI     | 516088                | plasmid | Bacteria | 3/5        | 4.5/5      |  |
| 134                                           | no   | <a href="#">Sinorhizobium melloti AK83</a>                     | GI     | 256269                | plasmid | Bacteria | 3/5        | 4.5/5      |  |
| 137                                           | no   | <a href="#">Rhizobium leguminosarum bv. viciae 3841</a>        | GI     | 488135                | plasmid | Bacteria | 3/5        | 4.5/5      |  |
| 138                                           | no   | <a href="#">Mesorhizobium ciceri biovar biserrulae WSM1271</a> | GI     | 425539                | plasmid | Bacteria | 3/5        | 4.5/5      |  |
| 138                                           | no   | <a href="#">Mesorhizobium loti MAFF303099</a>                  | GI     | 208315                | plasmid | Bacteria | 3/5        | 4.5/5      |  |
| 138                                           | no   | <a href="#">Rhizobium leguminosarum bv. trifolii WSM2304</a>   | GI     | 308747                | plasmid | Bacteria | 3/5        | 4.5/5      |  |

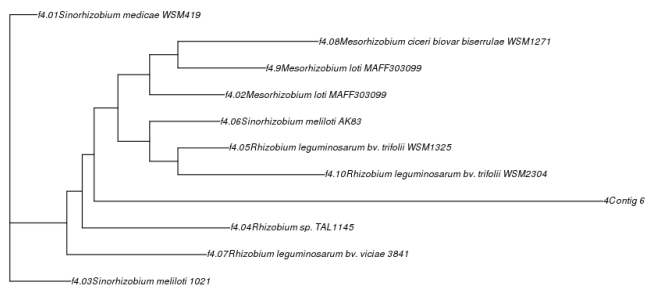

## Protein blast hits against plasmid proteins

Number of hits Subject plasmid

- 13 *Azospirillum* sp. B510 plasmid pAB510f [NC\_013860]
- 12 *Rhizobium leguminosarum* bv. trifolii WSM1325 plasmid pR132504 [NC\_012852]
- 12 *Acaryochloris marina* MBIC11017 plasmid pREB1 [NC\_009926]
- 11 *Rhizobium leguminosarum* bv. trifolii WSM1325 plasmid pR132505 [NC\_012854]
- 11 *Rhizobium etli* CFN 42 plasmid p42c [NC\_007764]
- 10 *Anabaena variabilis* ATCC 29413 plasmid C [NC\_007412]
- 10 *Roseobacter denitrificans* plasmid pTB1 [NC\_008386]
- 9 *Halomicrobium mukohataei* DSM 12286 plasmid pHmuk01 [NC\_013201]

Significant protein blast hit:



Program - bl2seq; Sequence type - genome; Summarized score = 3065; Best expectation = 0.000000 Contig 6 (37591 bp), Contig, 6 (37591 bp)

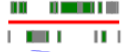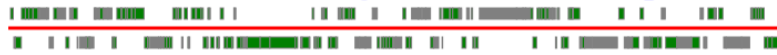

Azospirillum sp. B510 plasmid pAB510f, complete sequence., NC\_013860, NC\_013860 (261596 bp)

Program - bl2seq; Sequence type - genome; Summarized score = 1699; Best expectation = 0.000000 Contig 6 (37591 bp), Contig, 6 (37591 bp)

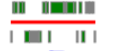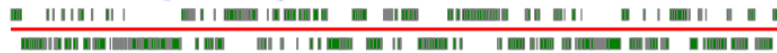

Rhizobium leguminosarum bv. trifolii WSM1325 plasmid pR132504., NC\_012852, NC\_012852 (350312 bp)

## Analysis of DNA fragment (contig 7) containing LAE5

| fasta 5 (length:36672)<br>Contig 7 (36672 bp) |      |                                                   |        |                       |         |          |            |            |
|-----------------------------------------------|------|---------------------------------------------------|--------|-----------------------|---------|----------|------------|------------|
| Distance (A.U.Euclidean)                      | rRNA | Subject                                           | Strain | Reference length (pb) | Origin  | Taxonomy | similarity | confidence |
| 120                                           | no   | <a href="#">Azotobacter vinelandii DJ</a>         | GI     | 5365318               | genomic | Bacteria | 4/5        | 4.5/5      |
| 128                                           | no   | <a href="#">Azospirillum sp. B510</a>             | GI     | 261596                | plasmid | Bacteria | 3/5        | 4.5/5      |
| 129                                           | no   | <a href="#">Caulobacter sp. K31</a>               | GI     | 177878                | plasmid | Bacteria | 3/5        | 4.5/5      |
| 130                                           | no   | <a href="#">Azospirillum lipoferum 4B</a>         | GI     | 2988332               | genomic | Bacteria | 3/5        | 4.5/5      |
| 131                                           | no   | <a href="#">Pseudomonas aeruginosa LESB58</a>     | GI     | 6601757               | genomic | Bacteria | 3/5        | 4.5/5      |
| 132                                           | no   | <a href="#">Pseudomonas aeruginosa UCBPP-PA14</a> | GI     | 6537648               | genomic | Bacteria | 3/5        | 4.5/5      |
| 132                                           | no   | <a href="#">Azospirillum sp. B510</a>             | GI     | 723779                | plasmid | Bacteria | 3/5        | 4.5/5      |
| 133                                           | no   | <a href="#">Azospirillum lipoferum 4B</a>         | GI     | 1040425               | plasmid | Bacteria | 3/5        | 4.5/5      |
| 133                                           | no   | <a href="#">Azospirillum lipoferum 4B</a>         | GI     | 295744                | plasmid | Bacteria | 3/5        | 4.5/5      |
| 133                                           | no   | <a href="#">Pseudomonas sp. 2_1_26</a>            | GI     | 6447528               | genomic | Bacteria | 3/5        | 4.5/5      |

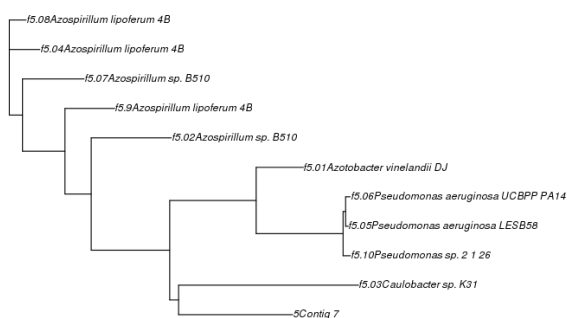

## Protein blast hits against plasmid proteins

| Number of hits | Subject plasmid                                                       |
|----------------|-----------------------------------------------------------------------|
| 10             | <i>Thermus thermophilus</i> HB8 plasmid pTT27 [NC_006462]             |
| 10             | <i>Mesorhizobium</i> sp. BNC1 plasmid 2 [NC_008243]                   |
| 10             | <i>Rhodobacter sphaeroides</i> ATCC 17029 plasmid pRSPH01 [NC_009040] |
| 9              | <i>Agrobacterium radiobacter</i> K84 plasmid pAtK84c [NC_011987]      |

## Significant protein blast hit:

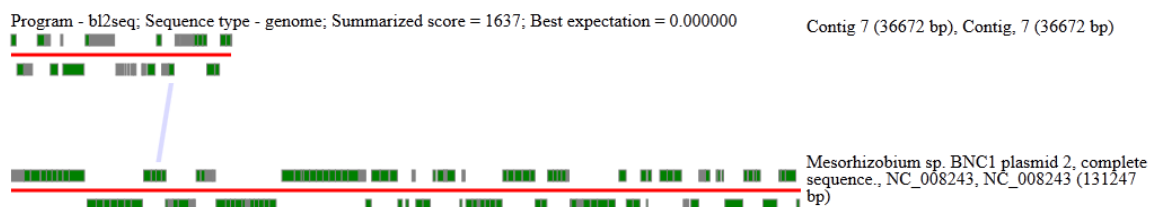

## Analysis of DNA fragment (contig 19) containing LAE6

| fasta 6 (length:2827)<br>Contig 19 (2827 bp) |      |                                                    |        |                       |         |          |            |            |  |
|----------------------------------------------|------|----------------------------------------------------|--------|-----------------------|---------|----------|------------|------------|--|
| Distance (A.U.Euclidean)                     | rRNA | Subject                                            | Strain | Reference length (pb) | Origin  | Taxonomy | similarity | confidence |  |
| 170                                          | no   | <a href="#">Acidiphilium cryptum JF-5</a>          | GI     | 3389227               | genomic | Bacteria | 2/5        | 3.5/5      |  |
| 173                                          | no   | <a href="#">Acidiphilium multivorum AIU301</a>     | GI     | 3749411               | genomic | Bacteria | 2/5        | 3.5/5      |  |
| 175                                          | no   | <a href="#">Starkeya novella DSM 506</a>           | GI     | 4765023               | genomic | Bacteria | 2/5        | 3.5/5      |  |
| 179                                          | no   | <a href="#">Methylobacterium populi BJ001</a>      | GI     | 5800441               | genomic | Bacteria | 2/5        | 3.5/5      |  |
| 186                                          | no   | <a href="#">Phenylobacterium zucineum HLK1</a>     | GI     | 3996255               | genomic | Bacteria | 2/5        | 3.5/5      |  |
| 186                                          | no   | <a href="#">Azospirillum sp. B510</a>              | GI     | 628837                | plasmid | Bacteria | 2/5        | 3.5/5      |  |
| 187                                          | no   | <a href="#">Methylobacterium extorquens AM1</a>    | GI     | 5511322               | genomic | Bacteria | 2/5        | 3.5/5      |  |
| 189                                          | no   | <a href="#">Xanthobacter autotrophicus Py2</a>     | GI     | 5308934               | genomic | Bacteria | 2/5        | 3.5/5      |  |
| 190                                          | no   | <a href="#">Methylobacterium nodulans ORS 2060</a> | GI     | 7772460               | genomic | Bacteria | 2/5        | 3.5/5      |  |
| 191                                          | no   | <a href="#">Azospirillum lipoferum 4B</a>          | GI     | 645253                | plasmid | Bacteria | 2/5        | 3.5/5      |  |

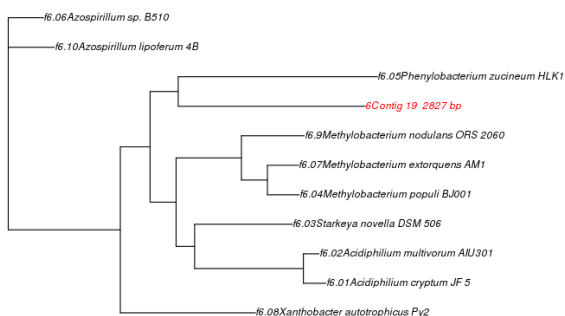

## Protein blast hits against plasmid proteins

Number of hits

Subject plasmid

3

*Spingomonas* sp. KA1 plasmid pCAR3 [NC\_008308]

**Table S1** General features of reported esterases/lipases isolated from metagenomic resources. Data are based on bibliographic records that are specifically cited.

| Source                                                                                                                     | Enzyme description                         | Substrates tested, kinetic parameters and pH and temperature optima <sup>1</sup>                                                                                                                                                                                                                                                                                                                                                                                                                                                                               | Reference                                                                                                                                                                                                                                                                                                 |
|----------------------------------------------------------------------------------------------------------------------------|--------------------------------------------|----------------------------------------------------------------------------------------------------------------------------------------------------------------------------------------------------------------------------------------------------------------------------------------------------------------------------------------------------------------------------------------------------------------------------------------------------------------------------------------------------------------------------------------------------------------|-----------------------------------------------------------------------------------------------------------------------------------------------------------------------------------------------------------------------------------------------------------------------------------------------------------|
| <b>Soil samples</b>                                                                                                        |                                            |                                                                                                                                                                                                                                                                                                                                                                                                                                                                                                                                                                |                                                                                                                                                                                                                                                                                                           |
| Fat contaminated soil collected from a wastewater treatment plant                                                          | 1 Lipase                                   | Opt. pH: 4.5-10.0<br>Opt Temp.: 60°C<br>Opt. NaCl: up to 3.7 M NaCl<br>Spec. act.: 2187 $\mu\text{molmin}^{-1}\text{mg}^{-1}$ (tributyrin)<br>Relevant properties: the pure enzyme has specific activities of 1722 U/mg and 1767 U/mg against olive oil and pig fat, respectively; it is highly stable in organic solvents at 15% and 30% (v/v).                                                                                                                                                                                                               | <b>Glogauer A, Martini VP, Faoro H, Couto GH, Müller-Santos M, Monteiro RA, Mitchell DA, de Souza EM, Pedrosa FO, Krieger N.</b> 2011. Identification and characterization of a new true lipase isolated through metagenomic approach. <i>Microb. Cell Fact.</i> <b>10</b> :54.                           |
| Peat-swamp forest soil                                                                                                     | 1 Esterase/lipase                          | Opt. pH: 5.0<br>Opt Temp.: 50°C<br>$K_m$ : 0.08 mM ( <i>pNPC</i> <sub>4</sub> )<br>$V_{max}$ : 88.75 $\mu\text{molmin}^{-1}$ ( <i>pNPC</i> <sub>4</sub> )<br>$k_{cat}/K_m$ : 583.88 $\text{s}^{-1}\text{mM}^{-1}$ ( <i>pNPC</i> <sub>4</sub> )                                                                                                                                                                                                                                                                                                                 | <b>Bunterngsook B, Kanokratana P, Thongaram T, Tanapongpipat S, Uengwetwanit T, Rachdawong S, Vichitsoonthonkul T, Eurwilaichitr L.</b> 2010. Identification and characterization of lipolytic enzymes from a peat-swamp forest soil metagenome. <i>Biosci. Biotechnol. Biochem.</i> <b>74</b> :1848-1854 |
| Oil contaminated soil                                                                                                      | 2 Lipases                                  | Opt. pH: 10.0<br>Opt Temp.: 30°C; the enzyme still displayed 28% residual activity at 0°C and 16% at -5°C.<br>Spec. act.: up to 513.6 $\mu\text{molmin}^{-1}\text{mg}^{-1}$ ( <i>pNPC</i> <sub>4</sub> )<br>Relevant properties: Stereo-selective for ibuprofen- <i>p</i> NP ester with a high preference for the ( <i>R</i> ) enantiomer of >91% ee and it demonstrated selectivity for esters of primary alcohols, whereas esters of secondary or tertiary alcohols were nearly not converted; one enzyme was highly enantioselective for (+)-menthylacetate | <b>Elend C, Schmeisser C, Hoebenreich H, Steele HL, Streit WR.</b> 2007. Isolation and characterization of a metagenome-derived and cold-active lipase with high stereospecificity for ( <i>R</i> )-ibuprofen esters. <i>J. Biotechnol</i> <b>130</b> :370-377                                            |
| Antarctic Desert Soil                                                                                                      | 1 Esterase                                 | Opt. pH: alkaline pH<br>Opt Temp.: 7-54°C<br>$K_m$ : 0.27 mM ( <i>pNPC</i> <sub>3</sub> )<br>$k_{cat}/K_m$ : 14.8 $\text{s}^{-1}\text{mM}^{-1}$ ( <i>pNPC</i> <sub>3</sub> )<br>Relevant properties: -                                                                                                                                                                                                                                                                                                                                                         | <b>Heath C, Hu XP, Cary SC, Cowan D.</b> 2009. Identification of a novel alkaliphilic esterase active at low temperatures by screening a metagenomic library from antarctic desert soil. <i>Appl. Environ. Microbiol.</i> <b>75</b> :4657-4659                                                            |
| Alkaline-polluted soil samples were collected from the ground surface of a stream located in Guangxi Province, South China | 1 Bifunctional $\beta$ -glucosidase/lipase | Opt. pH: 8.0<br>Opt Temp.: 30°C<br>Spec. act.: 8.2 $\mu\text{molmin}^{-1}\text{mg}^{-1}$ ( <i>pNPC</i> <sub>4</sub> )<br>$K_m$ : 0.88 mM ( <i>pNPC</i> <sub>4</sub> )<br>$k_{cat}/K_m$ : 241 $\text{min}^{-1}\text{mM}^{-1}$ ( <i>pNPC</i> <sub>3</sub> )<br>Relevant properties: $\beta$ -glucosidase with lipolytic activity                                                                                                                                                                                                                                 | <b>Jiang CJ, Chen G, Huang J, Huang Q, Jin K, Shen PH, Li JF, Wu B.</b> 2011. A novel $\beta$ -glucosidase with lipolytic activity from a soil metagenome. <i>Folia Microbiol.</i> <b>56</b> :563-570                                                                                                     |
| High Andean forest soil metagenome                                                                                         | 1 Esterase                                 | Opt. pH: 8.0<br>Opt Temp.: 10°C<br>Spec. act.: 0.142 $\mu\text{molmin}^{-1}\text{mg}^{-1}$ ( <i>pNPC</i> <sub>4</sub> )                                                                                                                                                                                                                                                                                                                                                                                                                                        | <b>Jiménez DJ, Montaña JS, Alvarez D, Baena S.</b> 2012. A novel cold active esterase derived from Colombian high Andean forest soil metagenome. <i>World J. Microbiol. Biotechnol.</i> <b>28</b> :361-370                                                                                                |
| Top soil samples (5 to 10 cm) from vegetable soil                                                                          | 1 Pyrethroid-hydrolyzing esterase          | Opt. pH: 5.5-9.0 (with maximum at 7.0)<br>Opt Temp.: 40°C                                                                                                                                                                                                                                                                                                                                                                                                                                                                                                      | <b>Li G, Wang K, Liu YH.</b> 2008. Molecular cloning and characterization of a novel pyrethroid-                                                                                                                                                                                                          |

|                                                                                                                                       |                            |                                                                                                                                                                                                                                                                                                                                                                                           |                                                                                                                                                                                                                                                                               |
|---------------------------------------------------------------------------------------------------------------------------------------|----------------------------|-------------------------------------------------------------------------------------------------------------------------------------------------------------------------------------------------------------------------------------------------------------------------------------------------------------------------------------------------------------------------------------------|-------------------------------------------------------------------------------------------------------------------------------------------------------------------------------------------------------------------------------------------------------------------------------|
|                                                                                                                                       |                            | Spec. act.: 429 $\mu\text{molmin}^{-1}\text{mg}^{-1}$ (pNPC8)<br>Relevant properties: the enzyme shows a broader substrate specificities and high activity of the pyrethroid-hydrolyzing esterase (Pye3) make it an ideal candidate for in situ for detoxification of pyrethroids where they cause environmental contamination problems.                                                  | hydrolyzing esterase originating from the metagenome. Microb. Cell Fact. 7:38                                                                                                                                                                                                 |
| Soil samples of the German Biodiversity Exploratories: 10 German forest soils (A horizons) and six grassland soils (A and B horizons) | 37 Lipolytic gene products | Opt. pH: -<br>Opt Temp.: -<br>Spec. act.: up to 0.835 $\mu\text{molmin}^{-1}\text{ml}^{-1}$ (pNPC <sub>4</sub> )<br>Relevant properties: 35 out of the 37 predicted proteins are members of known families of lipolytic enzymes                                                                                                                                                           | <b>Nacke H, Will C, Herzog S, Nowka B, Engelhaupt M, Daniel R.</b> 2011. Identification of novel lipolytic genes and gene families by screening of metagenomic libraries derived from soil samples of the German Biodiversity Exploratories. FEMS Microbiol. Ecol. 78:188–201 |
| Forest soil                                                                                                                           | 6 Lipases                  | Opt. pH: -<br>Opt Temp.: -<br>Relevant properties: the identity values were far lower to a level of 20%-40%                                                                                                                                                                                                                                                                               | <b>Hong KS, Lim HK, Chung EJ, Park EJ, Lee MH, Kim JC, Choi GJ, Cho KY, Lee SW.</b> 2007. Selection and characterization of forest soil metagenome genes encoding lipolytic enzymes. J. Microbiol. Biotechnol. 17:1655-1660                                                   |
| Antarctic soil                                                                                                                        | 1 Lipase                   | Opt. pH: 8.0<br>Opt Temp.: 35°C<br>Relevant properties: -                                                                                                                                                                                                                                                                                                                                 | <b>Cieśliński H, Białkowska A, Tkaczuk K, Długolecka A, Kur J, Turkiewicz M.</b> 2009. Identification and molecular modeling of a novel lipase from an Antarctic soil metagenomic library. Pol. J. Microbiol. 58:199-204                                                      |
| Forest topsoil                                                                                                                        | 1 Lipases                  | Opt. pH: -<br>Opt Temp.: -<br>Spec. act.: up to >0.1 $\mu\text{molmin}^{-1}\text{ml}^{-1}$ (pNPC <sub>4</sub> )<br>Relevant properties: -                                                                                                                                                                                                                                                 | <b>Lee SW, Won K, Lim HK, Kim JC, Choi GJ, Cho KY.</b> 2004. Screening for novel lipolytic enzymes from uncultured soil microorganisms. Appl. Microbiol. Biotechnol. 65:720–726                                                                                               |
| Soil samples                                                                                                                          | 1 Lipase                   | Opt. pH: 7.0<br>Opt Temp.: 30°C<br>Spec. act.: 513 $\mu\text{molmin}^{-1}\text{mg}^{-1}$ (pNPC <sub>2</sub> )<br>Relevant properties: organic solvent stable lipase                                                                                                                                                                                                                       | <b>Khan M, Jithesh K.</b> 2012. Expression and purification of organic solvent stable lipase from soil metagenomic library. World J. Microbiol. Biotechnol. 28:2417–2424                                                                                                      |
| Soil                                                                                                                                  | 1 Esterase                 | Opt. pH: 5.0-10.0<br>Opt Temp.: 40°C; retained about 50% maximal activity at 5–10°C<br>Spec. act.: 254 $\mu\text{molmin}^{-1}\text{mg}^{-1}$ (pNPC <sub>2</sub> )<br>Relevant properties: remarkable stability in up to 50% (v/v) benzene and alkanes; the purified enzyme also cleaved sterically hindered esters of tertiary alcohols and has potential for use in industrial processes | <b>Jin P, Pei X, Du P, Yin X, Xiong X, Wu H, Zhou X, Wang Q.</b> 2012. Overexpression and characterization of a new organic solvent-tolerant esterase derived from soil metagenomic DNA. Bioresour. Technol. 116:234–240                                                      |
| Antarctic soil                                                                                                                        | 14 Lipases/esterases       | Opt. pH: -<br>Opt Temp.: 35-55°C<br>Relevant properties: -                                                                                                                                                                                                                                                                                                                                | <b>Berlemont R, Pipers D, Delsaute M, Angiono F, Feller G, Galleni M, Power P.</b> 2011. Exploring the Antarctic soil metagenome as a source of novel cold-adapted enzymes and genetic mobile elements. Rev. Argent. Microbiol. 43:94-103                                     |
| Miscellaneous environmental samples                                                                                                   | 35 Esterases               | Opt. pH: -<br>Opt Temp.: -<br>Relevant properties: high enantioselectivity ( $E > 100$ ) in the kinetic resolution of arylaliphatic tertiary alcohols such as 1,1,1-trifluoro-2-phenylbut-3-yn-2-yl acetate.                                                                                                                                                                              | Kourist R, Hari Krishna S, Patel JS, Bartnek F, Hitchman TS, Weiner DP, Bornscheuer UT. 2007. Identification of a metagenome-derived esterase with high enantioselectivity in the kinetic resolution of arylaliphatic tertiary alcohols. Org. Biomol. Chem. 5:3310–3313       |

|                                                                                                            |             |                                                                                                                                                                                                                                                                                                                                                                                                                                                                                                                          |                                                                                                                                                                                                                                                                                 |
|------------------------------------------------------------------------------------------------------------|-------------|--------------------------------------------------------------------------------------------------------------------------------------------------------------------------------------------------------------------------------------------------------------------------------------------------------------------------------------------------------------------------------------------------------------------------------------------------------------------------------------------------------------------------|---------------------------------------------------------------------------------------------------------------------------------------------------------------------------------------------------------------------------------------------------------------------------------|
| Pools of metagenomes from the Microbank of Microbial Genomics and Application Center (Taejon, South Korea) | 1 Esterase  | Opt. pH: 7.0-8.0<br>Opt Temp.: 65°C<br>Spec. act.: circa 22 mmolmin <sup>-1</sup> mg <sup>-1</sup> ( <i>pNPC</i> <sub>2</sub> )<br>Relevant properties: it shows specificity for ( <i>S</i> )-ketoprofen                                                                                                                                                                                                                                                                                                                 | <b>Yoon S, Kim S, Ryu Y, Kim TD.</b> 2007. Identification and characterization of a novel ( <i>S</i> )-ketoprofen-specific esterase. <i>t J Biol Macromol.</i> <b>41</b> :1–7                                                                                                   |
| Alluvial soil metagenomic library                                                                          | 2 Esterases | Opt. pH: 7.0-9.0<br>Opt Temp.: 25-35°C<br>Spec. act.: up to circa 550 mmolmin <sup>-1</sup> mg <sup>-1</sup> ( <i>pNPC</i> <sub>2</sub> )<br>Relevant properties: reactivate chloramphenicol by counteracting chloramphenicol acetyltransferase                                                                                                                                                                                                                                                                          | <b>Tao W, Lee MH, Yoon MY, Kim JC, Malhotra S, Wu J, Hwang EC, Lee SW.</b> 2011. Characterization of two metagenome-derived esterases that reactivate chloramphenicol by counteracting chloramphenicol acetyltransferase. <i>J. Microbiol. Biotechnol.</i> <b>21</b> :1203–1210 |
| Environmental soils                                                                                        | 1 Esterase  | Opt. pH: 7.0<br>Opt Temp.: 25°C<br><i>K<sub>m</sub></i> : 16.4 mM (( <i>R,S</i> )-ketoprofen ethyl ester)<br><i>V<sub>max</sub></i> : 59.1U/mg (( <i>R,S</i> )-ketoprofen ethyl ester)<br>Spec. act.: 103 mmolmin <sup>-1</sup> mg <sup>-1</sup> ( <i>pNPC</i> <sub>2</sub> )<br><i>K<sub>m</sub></i> : 1.0 mM ( <i>pNPC</i> <sub>2</sub> )<br><i>V<sub>max</sub></i> : 63.7U/mg ( <i>pNPC</i> <sub>2</sub> )<br>Relevant properties: slight enantioselectivity toward ( <i>R</i> )-ketoprofen ethyl ester: (eep» -4.6%) | <b>Kim YJ, Choi GS, Kim SB, Yoon GS, Kim YS, Ryu YW.</b> 2006. Screening and characterization of a novel esterase from a metagenomic library. <i>Protein Expr Purif.</i> <b>45</b> :315-323.                                                                                    |
| Glacier soil based                                                                                         | 2 Lipases   | Opt. pH: -<br>Opt Temp.: ≤40°C (had some low-temperature lipase characteristics, although they are not typical cold-active lipases)<br>Relevant properties: -                                                                                                                                                                                                                                                                                                                                                            | <b>Yuhong Z, Shi P, Liu W, Meng K, Bai Y, Wang G, Zhan Z, Yao B.</b> 2009. Lipase diversity in glacier soil based on analysis of metagenomic DNA fragments and cell culture. <i>J. Microbiol. Biotechnol.</i> <b>19</b> :888–897                                                |
| Plant rhizosphere soil                                                                                     | 1 Esterase  | Opt. pH: 8.0<br>Opt Temp.: 35°C<br><i>K<sub>m</sub></i> : 0.0794 mM ( <i>pNPC</i> <sub>4</sub> )<br><i>k<sub>cat</sub></i> : 120.5 s <sup>-1</sup> ( <i>pNPC</i> <sub>4</sub> )<br>Relevant properties: the esterase exhibited an increase in enzymatic activity in the presence of 15% butanol and 15% methanol; phylogenetic analysis revealed that the lipolytic protein may be a member of a novel family of lipolytic enzymes                                                                                       | Lee MH, Hong KS, Malhotra S, Park JH, Hwang EC, Choi HK, Kim YS, Tao W, Lee SW. <b>2010. A new esterase EstD2 isolated from plant rhizosphere soil metagenome.</b> <i>Appl. Microbiol. Biotechnol.</i> <b>88</b> :1125-1134.                                                    |
| Soil samples from Taishan (China) at three different altitudes (400, 800, 1,200 m)                         | 2 Lipases   | Opt. pH: 7.0-8.0<br>Opt Temp.: 20-40°C; about 60% activity at 10°C for one of the lipases<br>Spec. act.: up to 166 μmolmin <sup>-1</sup> mg <sup>-1</sup> ( <i>pNPC</i> <sub>16</sub> )<br>Relevant properties: thermostable lipase despite the low homology with some known lipases                                                                                                                                                                                                                                     | Wei P, Bai L, Song W, Hao G. <b>2009. Characterization of two soil metagenome-derived lipases with high specificity for p-nitrophenyl palmitate.</b> <i>Arch. Microbiol.</i> <b>191</b> :233-240                                                                                |
| Antarctic desert soil                                                                                      | 1 Esterase  | Opt. pH: 11.0<br>Opt Temp.: 20°C<br>Spec. act.: - mmolmin <sup>-1</sup> mg <sup>-1</sup> ( <i>pNPC</i> <sub>4</sub> )<br>Relevant properties: esterases possessing such extreme alkaliphily are rare and so this enzyme represents an intriguing novel locus in protein sequence space                                                                                                                                                                                                                                   | Hu, X.P., Heath, C., Taylor, M.P., Tuffin, M. & Cowan, D., <b>2012: A novel, extremely alkaliphilic and cold-active esterase from antarctic desert soil.</b> <i>Extremophiles</i> <b>16</b> :79-86                                                                              |
| Alluvial soil                                                                                              | 1 Esterase  | Opt. pH: 8.0<br>Opt Temp.: 40°C<br><i>K<sub>m</sub></i> : 1.3 mM ( <i>pNPC</i> <sub>4</sub> )<br><i>k<sub>cat</sub></i> : 2293 s <sup>-1</sup> ( <i>pNPC</i> <sub>4</sub> )<br><i>k<sub>cat</sub></i> / <i>K<sub>m</sub></i> : 176.4 s <sup>-1</sup> mM <sup>-1</sup> ( <i>pNPC</i> <sub>4</sub> )<br>Relevant properties: tolerated well the presence of methanol and Tween 20; its activity is strongly                                                                                                                | Tao, W., Lee, M.H., Wu, J., Kim, N.H. & Lee, S.W., <b>2011: Isolation and characterization of a family vii esterase derived from alluvial soil metagenomic library.</b> <i>J. Microbiol</i> <b>49</b> :178-185                                                                  |

inhibited by 1 mM Cu(2+) and Zn(2+), but stimulated by Fe(2+); it is high activity under alkaline conditions and stable in the presence of organic solvents

### Bioreactors and activated sludges

|                                                              |            |                                                                                                                                                                                                                                                                                                                                                                                 |                                                                                                                                                                                                                                             |
|--------------------------------------------------------------|------------|---------------------------------------------------------------------------------------------------------------------------------------------------------------------------------------------------------------------------------------------------------------------------------------------------------------------------------------------------------------------------------|---------------------------------------------------------------------------------------------------------------------------------------------------------------------------------------------------------------------------------------------|
| Biomass enrichment in a fed-batch bioreactor                 | 7 Lipases  | Opt. pH: 8.5<br>Opt Temp.: 60°C<br>Spec. act.: 4284 mmolmin <sup>-1</sup> mg <sup>-1</sup> (pNPC <sub>4</sub> )<br>Relevant properties: activity increases in the presence of 30% acetonitrile, ethanol, methanol and acetone                                                                                                                                                   | <b>Côté A, Shareck F.</b> 2010. Expression and characterization of a novel heterologous moderately thermostable lipase derived from metagenomics in <i>Streptomyces lividans</i> . <i>J. Ind. Microbiol. Biotechnol.</i> <b>37</b> :883–891 |
| Activated sludge                                             | 1 Lipase   | Opt. pH: 7.0<br>Opt Temp.: 10°C<br>K <sub>m</sub> : 0.15 mM (pNPC <sub>4</sub> )<br>k <sub>cat</sub> : 26.5 s <sup>-1</sup> (pNPC <sub>4</sub> )<br>Spec. act.: 150.2 μmolmin <sup>-1</sup> mg <sup>-1</sup> (U/mg) (pNPC <sub>4</sub> )<br>k <sub>cat</sub> /K <sub>m</sub> : 176.7 s <sup>-1</sup> mM <sup>-1</sup> (pNPC <sub>4</sub> )                                      | <b>Roh C, Villatte F.</b> 2008. Isolation of a low-temperature adapted lipolytic enzyme from uncultivated micro-organism. <i>J. Appl. Microbiol.</i> <b>105</b> :116-123.                                                                   |
| Biomass produced in an enriched sequencing fed-batch reactor | 1 Lipase   | Opt. pH: 10.5<br>Opt Temp.: 60°C<br>Relevant properties: exhibited maximal activity with pNPC <sub>14</sub> but not absolute value is given                                                                                                                                                                                                                                     | <b>Meilleur C, Hupé JF, Juteau P, Shareck F.</b> 2009. Isolation and characterization of a new alkali-thermostable lipase cloned from a metagenomic library. <i>J. Ind. Microbiol. Biotechnol.</i> <b>36</b> :853–861                       |
| Activated sludge                                             | 1 Lipase   | Opt. pH: 8.5<br>Opt Temp.: 35°C<br>Spec. act.: up to 4615 μmolmin <sup>-1</sup> ml <sup>-1</sup> (pNPC <sub>8</sub> )<br>Relevant properties: exhibited the same level of activity in the presence of metal ions or detergents and it showed high level of stability with unique substrate specificities makes it highly valuable for downstream biotechnological applications. | <b>JunGang L, KeGui Z, WenJun H.</b> 2010. Cloning and biochemical characterization of a novel lipolytic gene from activated sludge metagenome, and its gene product. <i>Microb. Cell Fact.</i> <b>9</b> :83                                |
| Activated sludge metagenome                                  | 1 Esterase | Opt. pH: 9.0<br>Opt Temp.: 35°C<br>Spec. act.: up to 5370 μmolmin <sup>-1</sup> ml <sup>-1</sup> (pNPC <sub>6</sub> )<br>Relevant properties: hydrolyze pNP esters of fatty acids with short chain lengths (≤ C8); it also exhibited the same level of stability in the presence of metal ions or detergents.                                                                   | <b>Zhang T, Han WJ.</b> 2009. Gene cloning and characterization of a novel esterase from activated sludge metagenome. <i>Microb. Cell Fact.</i> <b>8</b> :67                                                                                |

### Compost samples

|                                                                     |                                                               |                                                                                                                                                                                                                                                                                                                             |                                                                                                                                                                                                                                          |
|---------------------------------------------------------------------|---------------------------------------------------------------|-----------------------------------------------------------------------------------------------------------------------------------------------------------------------------------------------------------------------------------------------------------------------------------------------------------------------------|------------------------------------------------------------------------------------------------------------------------------------------------------------------------------------------------------------------------------------------|
| Compost                                                             | 1 Esterase                                                    | Opt. pH: 9.0<br>Opt Temp.: 55°C<br>Relevant properties: Remarkable stability in up to 50% (v/v) dimethyl sulfoxide (DMSO) or dimethylformamide (DMF). The enzyme has the ability to cleave sterically hindered esters of tertiary alcohol, as well as to degrade polyurethanes, which are widely used in various industries | <b>Kang CH, Oh KH, Lee MH, Oh TK, Kim BH, Yoon J.</b> 2011. A novel family VII esterase with industrial potential from compost metagenomic library. <i>Microb. Cell Fact.</i> <b>10</b> :41                                              |
| Compost containing poly(lactic acid) (PLA)-degrading microorganisms | 3 Poly (DL-lactic acid) depolymerases                         | Opt. pH: -<br>Opt Temp.: 70°C<br>Spec. act.: up to 234.8 μmolmin <sup>-1</sup> mg <sup>-1</sup> (U/mg) (pNPC <sub>6</sub> )<br>Relevant properties: The enzyme can effectively degrade PLA                                                                                                                                  | <b>Mayumi D, Akutsu-Shigeno Y, Uchiyama H, Nomura N, Nakajima-Kambe T.</b> 2008. Identification and characterization of novel poly(DL-lactic acid) depolymerases from metagenome. <i>Appl. Microbiol. Biotechnol.</i> <b>79</b> :743–750 |
| Leaf-Branch Compost                                                 | 1 Cutinase with polyethylene terephthalate-degrading activity | Opt. pH: 8.5<br>Opt Temp.: 50°C<br>Spec. act.: 12 μmolh <sup>-1</sup> mg <sup>-1</sup> (U/mg) (polyethylene terephthalate)<br>Spec. act.: 2.7 μmolmin <sup>-1</sup> mg <sup>-1</sup> (U/mg) (pNPC <sub>6</sub> )                                                                                                            | <b>Sulaiman S, Yamato S, Kanaya E, Kim JJ, Koga Y, Takano K, Kanaya S.</b> 2012. Isolation of a novel cutinase homolog with polyethylene terephthalate-degrading activity from leaf-branch compost by using                              |

|                                          |             |                                                                                                                                                                                                                                                                                                                               |                                                                                                                                                                                                                                          |
|------------------------------------------|-------------|-------------------------------------------------------------------------------------------------------------------------------------------------------------------------------------------------------------------------------------------------------------------------------------------------------------------------------|------------------------------------------------------------------------------------------------------------------------------------------------------------------------------------------------------------------------------------------|
|                                          |             | Relevant properties: hydrolyzed various fatty acid monoesters with acyl chain lengths of 2 to 18, and had an ability to degrade poly(-caprolactone) and polyethylene terephthalate (PET). It is potentially applicable for surface modification and degradation of PET                                                        | a metagenomic approach. Appl. Environ. Microbiol. <b>78</b> :1556-1562.                                                                                                                                                                  |
| Compost metagenomic library              | 1 Esterase  | Opt. pH: 10.0<br>Opt Temp.: 50°C<br>Spec. act.: 17.1 $\mu\text{molmin}^{-1}\text{mg}^{-1}$ (U/mg) (pNPC <sub>6</sub> )<br>Relevant properties: stable in the presence of 30% methanol and exhibited a 2.4-fold higher activity in the presence of 5% methanol than in the presence of 1% isopropanol                          | <b>Kim YH, Kwon EJ, Kim SK, Jeong YS, Kim J, Yun HD, Kim H.</b> 2010. clonal cloning and characterization of a novel family VIII alkaline esterase from a compost metagenomic library. Biochem. Biophys. Res. Commun. <b>393</b> :45-49. |
| <b>Marine sediments</b>                  |             |                                                                                                                                                                                                                                                                                                                               |                                                                                                                                                                                                                                          |
| Deep-sea metagenomic library             | 1 Esterase  | Opt. pH: 9.0<br>Opt Temp.: 0-60°C; best activity at 50°C, but was unstable at 60°C<br>$K_m$ : 0.46 mM (pNPC4)<br>$k_{cat}$ : 1200 $\text{s}^{-1}$ (pNPC4)<br>$k_{cat}/K_m$ : 2600 $\text{s}^{-1}\text{mM}^{-1}$ (pNPC4)<br>Relevant properties: stable in the presence of 10% DMSO and 20% methanol                           | <b>Fu C, Hu Y, Xie F, Guo H, Ashforth EJ, Polyak SW, Zhu B, Zhang L.</b> 2011. Molecular cloning and characterization of a new cold-active esterase from a deep-sea metagenomic library. Appl. Microbiol. Biotechnol. <b>90</b> :961-970 |
| Marine sediment                          | 1 Lipase    | Opt. pH: -<br>Opt Temp.: 35°C<br>Spec. act.: circa 160 $\mu\text{molmin}^{-1}\text{mg}^{-1}$ (pNPC4)                                                                                                                                                                                                                          | <b>Hårdeman F, Sjöling S.</b> 2007. Metagenomic approach for the isolation of a novel low-temperature-active lipase from uncultured bacteria of marine sediment. FEMS Microbiol. Ecol. <b>59</b> :524-534                                |
| Deep-sea sediment                        | 1 Esterase  | Opt. pH: 10.0-11.0<br>Opt Temp.: 10-40°C<br>Spec. act.: up to 156 $\mu\text{molmin}^{-1}\text{mg}^{-1}$ (pNPC4)<br>Relevant properties: Anionic detergents (SDS and Sarkosyl) showed a very weak inhibitory effect, and most neutral detergent had little activating effect                                                   | <b>Park HJ, Jeon JH, Kang SG, Lee JH, Lee SA, Kim HK.</b> 2007. Functional expression and refolding of new alkaline esterase, EM2L8 from deep-sea sediment metagenome. Protein Expr. Purif. <b>52</b> :340-347.                          |
| Arctic Sediment                          | 2 Esterases | Opt. pH: 8.0<br>Opt Temp.: 20-40°C<br>Spec. act.: up to 59.8 $\mu\text{molmin}^{-1}\text{mg}^{-1}$ (pNPC4 and pNPC6)<br>Relevant properties: the esterases could hydrolyze racemic ofloxacin esters, and hydrolyzed preferentially (S)-racemic ofloxacin butyl ester with an enantiomeric excess (eep) value of 70.3%.        | <b>Jeon JH, Kim JT, Kang SG, Lee JH, Kim SJ.</b> 2009. Characterization and its potential application of two esterases derived from the arctic sediment metagenome. Mar. Biotechnol. <b>11</b> :307-316                                  |
| Deep-sea sediment                        | 1 Lipase    | Opt. pH: 8.0<br>Opt Temp.: 25°C (5-35°C)<br>Spec. act.: 203 $\mu\text{molmin}^{-1}\text{mg}^{-1}$ (trilaurin)<br>Relevant properties: enzyme resistant to various detergents such as Triton X-100 and Tween 80. This study represents an example which developed a new cold-active lipase from a deep-sea sediment metagenome | <b>Jeon JH, Kim JT, Kim YJ, Kim HK, Lee HS, Kang SG, Kim SJ, Lee JH.</b> 2009. Cloning and characterization of a new cold-active lipase from a deep-sea sediment metagenome. Appl. Microbiol. Biotechnol. <b>81</b> :865-874             |
| Deep-Sea Sediment                        | 5 Esterases | Opt. pH: 8.0<br>Opt Temp.: 15-50°C (depending on the enzyme)<br>Spec. act.: up to 558.2 $\mu\text{molmin}^{-1}\text{mg}^{-1}$ (pNPC6)<br>Relevant properties: high salt resistance with up to 4M NaCl                                                                                                                         | <b>Jeon JH, Kim JT, Lee HS, Kim SJ, Kang SG, Choi SH, Lee JH.</b> 2011. Novel lipolytic enzymes identified from metagenomic library of deep-sea sediment. Evid. Based Complement. Alternat. Med. <b>2011</b> :271419.                    |
| Neritic sediments of the South China Sea | 1 Esterase  | Opt. pH: 8.5<br>Opt Temp.: 40°C                                                                                                                                                                                                                                                                                               | <b>Peng Q, Zhang X, Shang M, Wang X, Wang G, Li B, Guan G, Li Y, Wang Y.</b> 2011. A novel esterase                                                                                                                                      |



|                                              |                 |                                                                                                                                                                                                                                                                                                                                                                                                                                                                                                                                                                                                                                                                                                                                                                          |                                                                                                                                                                                                                                                                            |
|----------------------------------------------|-----------------|--------------------------------------------------------------------------------------------------------------------------------------------------------------------------------------------------------------------------------------------------------------------------------------------------------------------------------------------------------------------------------------------------------------------------------------------------------------------------------------------------------------------------------------------------------------------------------------------------------------------------------------------------------------------------------------------------------------------------------------------------------------------------|----------------------------------------------------------------------------------------------------------------------------------------------------------------------------------------------------------------------------------------------------------------------------|
|                                              |                 | <p><math>K_m</math>: 0.858 mM (<i>pNPC</i><sub>4</sub>)<br/> <math>V_{max}</math>: 2260 <math>\mu\text{molmin}^{-1}\text{mg}^{-1}</math> (<i>pNPC</i><sub>4</sub>)<br/> <math>K_{cat}</math>: 9850 <math>\text{s}^{-1}</math> (<i>pNPC</i><sub>4</sub>)<br/> Relevant properties: compared to other metagenomic esterases, its played a notable role in specificity for substrate <i>pNPC</i><sub>4</sub> (<math>k_{cat}/K_m</math> value 11,500 <math>\text{s}^{-1}\text{mM}^{-1}</math>) and showed no inhibited by phenylmethylsulfonyl fluoride, suggested that the substrate binding pocket was suitable for substrate C<sub>4</sub> and the serine active-site residue was buried at the bottom of substrate binding pocket which sheltered by a lid structure</p> | gene cloned from a metagenomic library from neritic sediments of the South China Sea. <i>Microb. Cell Fact.</i> <b>10</b> :95.                                                                                                                                             |
| Deep-sea sediment                            | 9 Lipases       | <p>Opt. pH: 7.5<br/> Opt Temp.: 20°C<br/> <math>K_m</math>: 0.89 mM (<i>pNPC</i><sub>4</sub>)<br/> <math>V_{max}</math>: 66.7 <math>\mu\text{molmin}^{-1}\text{mg}^{-1}</math> (<i>pNPC</i><sub>4</sub>)<br/> Spec. act.: 104.41 <math>\mu\text{molmin}^{-1}\text{mg}^{-1}</math> (<i>pNPC</i><sub>4</sub>)<br/> Relevant properties: -</p>                                                                                                                                                                                                                                                                                                                                                                                                                              | Jiang X, Xu X, Huo Y, Wu Y, Zhu X, Zhang X, Wu M. 2012. Identification and characterization of novel esterases from a deep-sea sediment metagenome. <i>Arch. Microbiol.</i> <b>194</b> :207–214                                                                            |
| South China sea marine sediment              | 2 Lipases       | <p>Opt. pH: 8.0<br/> Opt Temp.: 40-50°C<br/> Spec. act.: up to 345.9 <math>\mu\text{molmin}^{-1}\text{mg}^{-1}</math> (U/mg) (<i>pNPC</i><sub>6</sub>)<br/> Relevant properties: could not be assigned to any known family, thus probably representing a novel family of the bacterial lipolytic enzyme. 20% concentration of DMSO increased the activity to about 127%</p>                                                                                                                                                                                                                                                                                                                                                                                              | <b>Hu Y, Fu C, Huang Y, Yin Y, Cheng G, Lei F, Lu N, Li J, Ashforth EJ, Zhang L, Zhu B.</b> 2010. Novel lipolytic genes from the microbial metagenomic library of the South China Sea marine sediment. <i>FEMS Microbiol. Ecol.</i> <b>72</b> :228–237                     |
| Tidal flat sediment                          | 3 Esterase      | <p>Opt. pH: 9.0<br/> Opt Temp.: 35°C<br/> Spec. act.: up to 5370 <math>\mu\text{molmin}^{-1}\text{ml}^{-1}</math> (U/mg) (<i>pNPC</i><sub>6</sub>)<br/> Relevant properties: the enzymes displayed salt tolerance with over 50% of the maximum activity remained in the presence of 3 M NaCl (or KCl)</p>                                                                                                                                                                                                                                                                                                                                                                                                                                                                | <b>Jeon, J.H., Lee, H.S., Kim, J.T., Kim, S.J., Choi, S.H., Kang, S.G. &amp; Lee, J.H.,</b> 2012: Identification of a new subfamily of salt-tolerant esterases from a metagenomic library of tidal flat sediment. <i>Appl. Microbiol. Biotechnol</i> <b>93</b> :623-631    |
| Tial flat sediments on the Korean west coast | 1 Phospholipase | Relevant properties: is the first experimentally characterized phospholipase A(1) with lipase activity obtained from a metagenomic library; the study provides insight into the evolution of lipases and phospholipases.                                                                                                                                                                                                                                                                                                                                                                                                                                                                                                                                                 | <b>Lee MH, Oh KH, Kang CH, Kim JH, Oh TK, Ryu CM, Yoon JH.</b> 2012. Novel metagenome-derived, cold-adapted alkaline phospholipase with superior lipase activity as an intermediate between phospholipase and lipase. <i>Appl. Environ. Microbiol.</i> <b>78</b> :4959-49. |
| Intertidal flat sediments                    | 1 Lipase        | <p>Opt. pH: 8.0-9.0<br/> Opt Temp.: 30°C (retained 47% of the activity at 5°C)<br/> Relevant properties: <i>pNPC</i><sub>12</sub> is the best substrate</p>                                                                                                                                                                                                                                                                                                                                                                                                                                                                                                                                                                                                              | Kim EY, Oh KH, Lee MH, Kang CH, Oh TK, Yoon JH. 2009. <b>Novel cold-adapted alkaline lipase from an intertidal flat metagenome and proposal for a new family of bacterial lipases.</b> <i>Appl. Environ. Microbiol.</i> <b>75</b> :257-220.                                |
| <b>Freshwater samples</b>                    |                 |                                                                                                                                                                                                                                                                                                                                                                                                                                                                                                                                                                                                                                                                                                                                                                          |                                                                                                                                                                                                                                                                            |
| Drinking water                               | 2 Esterases     | <p>Opt. pH: 9.0-10.0<br/> Opt Temp.: 47°C<br/> Spec. act.: up to 513.6 <math>\mu\text{molmin}^{-1}\text{mg}^{-1}</math> (<i>pNPC</i><sub>4</sub>)<br/> Relevant properties: Highly enantioselective for (-)-menthyl acetate; able to hydrolyze (+/-)-1-octin-3-ol, R-(+)-3-chlor-1-phenyl-1-propanol, trimethylsilylbutinol, <i>cis/trans</i>-1,2-cyclohexanediol and isopropylidenglycerol acetate</p>                                                                                                                                                                                                                                                                                                                                                                  | <b>Elend C, Schmeisser C, Leggewie C, Babiak P, Carballera JD, Steele HL, Reymond JL, Jaeger KE, Streit WR.</b> 2006. Isolation and biochemical characterization of two novel metagenome-derived esterases. <i>Appl. Environ. Microbiol.</i> <b>72</b> :3637-3645.         |
| Uncultured bacteria of pond                  | 12 Lipases      | Opt. pH: -                                                                                                                                                                                                                                                                                                                                                                                                                                                                                                                                                                                                                                                                                                                                                               | <b>Ranjan R, Grover A, Kapardar RK, Sharma R.</b>                                                                                                                                                                                                                          |

|                                               |                                             |                                                                                                                                                                                                                                                                                                                                                                                                                                                                                                                                                           |                                                                                                                                                                                                                                                                                       |
|-----------------------------------------------|---------------------------------------------|-----------------------------------------------------------------------------------------------------------------------------------------------------------------------------------------------------------------------------------------------------------------------------------------------------------------------------------------------------------------------------------------------------------------------------------------------------------------------------------------------------------------------------------------------------------|---------------------------------------------------------------------------------------------------------------------------------------------------------------------------------------------------------------------------------------------------------------------------------------|
| water                                         |                                             | Opt Temp.: -<br>Relevant properties: one of the proteins has high similarity to yet uncharacterized $\alpha/\beta$ hydrolase protein family.                                                                                                                                                                                                                                                                                                                                                                                                              | 2005. Isolation of novel lipolytic genes from uncultured bacteria of pond water. <i>Biochem. Biophys. Res. Commun.</i> <b>335</b> :57-65                                                                                                                                              |
| Metagenomic library of Yangtze River in China | 2 Esterases                                 | Opt. pH: 9.0<br>Opt Temp.: 50°C<br>$K_m$ : 0.018 mM (pNPC <sub>8</sub> )<br>Relevant properties: Mg <sup>2+</sup> was required for maximal activity; activity remained in the presence of 10% alcohol, acetone, isopropanol, and dimethyl sulfoxide                                                                                                                                                                                                                                                                                                       | <b>Wu C, Sun B.</b> 2009. Identification of novel esterase from metagenomic library of Yangtze river. <i>J. Microbiol. Biotechnol.</i> <b>19</b> :187–193                                                                                                                             |
| Thailand hot spring                           | 1 Patatin-like phospholipase and 1 esterase | Opt. pH: 7.0-10.0<br>Opt Temp.: 50-75°C<br>$K_m$ : 0.14 mM (pNPC <sub>4</sub> )<br>$k_{cat}$ : 574.17 s <sup>-1</sup> (pNPC <sub>4</sub> )<br>$V_{max}$ : 1065 $\mu\text{molmin}^{-1}\text{mg}^{-1}$ (pNPC <sub>4</sub> )<br>$k_{cat}/K_m$ : 4101.2 s <sup>-1</sup> mM <sup>-1</sup> (pNPC <sub>4</sub> )<br>Relevant properties: -                                                                                                                                                                                                                       | <b>Tirawongsaroj P, Sriprang R, Harnpicharnchai P, Thongaram T, Champreda V, Tanapongpipat S, Pootanakit K, Eurwilaichitr L.</b> 2008. Novel thermophilic and thermostable lipolytic enzymes from a Thailand hot spring metagenomic library. <i>J. Biotechnol.</i> <b>133</b> :42-49. |
| Thermal environmental samples                 | 1 Esterase                                  | Opt. pH: -<br>Opt Temp.: 30-90°C<br>Relevant properties: hyperthermostable enzyme                                                                                                                                                                                                                                                                                                                                                                                                                                                                         | <b>Byun JS, Rhee JK, Kim ND, Yoon J, Kim DU, Koh E, Oh JW, Cho HS.</b> 2007. Crystal structure of hyperthermophilic esterase EstE1 and the relationship between its dimerization and thermostability properties. <i>BMC Struct. Biol.</i> <b>7</b> :47.                               |
| Yangtze River                                 | 1 Esterase                                  | Opt. pH: 9.0<br>Opt Temp.: 50°C<br>Spec. act.: up to circa 400 $\mu\text{molmin}^{-1}\text{mg}^{-1}$ (pNPC <sub>8</sub> )<br>Relevant properties: Activity remained in the presence of 10% alcohol, acetone, isopropanol, and dimethyl sulfoxide                                                                                                                                                                                                                                                                                                          | <b>Wu C, Sun B.</b> 2009. Identification of novel esterase from metagenomic library of Yangtze river. <i>J. Microbiol. Biotechnol.</i> <b>19</b> :187-193                                                                                                                             |
| <b>Marine water samples</b>                   |                                             |                                                                                                                                                                                                                                                                                                                                                                                                                                                                                                                                                           |                                                                                                                                                                                                                                                                                       |
| Intertidal Flat                               | 1 Lipase                                    | Opt. pH: 7.0-9.0<br>Opt Temp.: 30°C (denatured above 55°C)<br>Relevant properties: No amino acid similarity to any known lipolytic enzyme except in the consensus region; it's a cold-adapted alkaline lipase; best substrate pNPC <sub>12</sub> .                                                                                                                                                                                                                                                                                                        | <b>Kim EY, Oh KH, Lee MH, Kang CH, Oh TK, Yoon JH.</b> 2009. Novel cold-adapted alkaline lipase from an intertidal flat metagenome and proposal for a new family of bacterial lipases. <i>Appl. Environ. Microbiol.</i> <b>75</b> :257-260.                                           |
| Arctic intertidal sample                      | 1 Esterase                                  | Opt. pH: 7.5<br>Opt Temp.: 35°C<br>$K_m$ : 0.039 mM (pNPC <sub>6</sub> )<br>$k_{cat}$ : 25.8 s <sup>-1</sup> (pNPC <sub>6</sub> )<br>Relevant properties: The cold adaptation features seem primarily related to a high number of methionine and glycine residues and flexible loops in the high-resolution structures                                                                                                                                                                                                                                    | <b>Fu J, Leiros HK, de Pascale D, Johnson KA, Blencke HM, Landfald B.</b> 2012. Functional and structural studies of a novel cold-adapted esterase from an Arctic intertidal metagenomic library. <i>Appl. Microbiol. Biotechnol.</i> DOI 10.1007/s00253-012-4276-9                   |
| Urania deep-sea hypersaline anoxic basin      | 5 Esterases                                 | Opt. pH: 8.0-9.0<br>Opt Temp.: 40-60°C<br>Spec. act.: up to 4500 $\mu\text{molmin}^{-1}\text{mg}^{-1}$ (pNPC <sub>2</sub> )<br>$k_{cat}/K_m$ : up to 3500–3900 s <sup>-1</sup> mM <sup>-1</sup><br>Effect of NaCl: up to 180-fold activation by NaCl (2-4 M)<br>Relevant properties: two had no significant sequence homology to known esterases, hydrolyzed both carboxylesters and thioesters, and exhibited unusual, habitat-specific characteristics (preference for high hydrostatic pressure and salinity). One has an unusual structural signature | <b>Ferrer M, Golyshina OV, Chernikova TN, Khachane AN, Martins Dos Santos VA, Yakimov MM, Timmis KN, Golyshin PN.</b> 2005. Microbial enzymes mined from the Urania deep-sea hypersaline anoxic basin. <i>Chem. Biol.</i> <b>12</b> :895-904.                                         |

|                                                         |                                 |                                                                                                                                                                                                                                                                                                                                                                                                                                                                                                                                                                                                                                                                                                                                                           |                                                                                                                                                                                                                                                            |
|---------------------------------------------------------|---------------------------------|-----------------------------------------------------------------------------------------------------------------------------------------------------------------------------------------------------------------------------------------------------------------------------------------------------------------------------------------------------------------------------------------------------------------------------------------------------------------------------------------------------------------------------------------------------------------------------------------------------------------------------------------------------------------------------------------------------------------------------------------------------------|------------------------------------------------------------------------------------------------------------------------------------------------------------------------------------------------------------------------------------------------------------|
|                                                         |                                 | incorporating three catalytic active centers mediating distinct hydrolytic activities and an adaptive structures depending physico-chemical conditions. Some of the esterases have high activities, specificities, enantioselectivities, and exceptional stability in polar solvents, and they are therefore potentially useful for industrial biotransformations. One possesses the highest enantioselectivity toward an ester of the important chiral synthon solketal ( <i>E</i> : 126[S]; 98% <i>ee</i> ); the $k_{cat}/K_m$ ratios of three of the five esterases greatly exceed published values for the hydrolysis of <i>p</i> NP-esters, paraben analogs, and $\alpha$ amino acid esters (600–3900 versus 400 s <sup>-1</sup> mM <sup>-1</sup> ). |                                                                                                                                                                                                                                                            |
| Korean tidal flat metagenomic library                   | 1 Lipase                        | Opt. pH: -<br>Opt Temp.: -<br>$K_m$ : 0.8 mM ( <i>p</i> NPC <sub>16</sub> )<br>$k_{cat}$ : 1210 s <sup>-1</sup> ( <i>p</i> NPC <sub>16</sub> )<br>$k_{cat}/K_m$ : 1090 s <sup>-1</sup> mM <sup>-1</sup> ( <i>p</i> NPC <sub>16</sub> )<br>Spec. act.: 458.8 $\mu$ molmin <sup>-1</sup> mg <sup>-1</sup> ( <i>p</i> NPC <sub>16</sub> )<br>Relevant properties: -                                                                                                                                                                                                                                                                                                                                                                                          | <b>Lee MH, Lee CH, Oh TK, Song JK, Yoon JH.</b> 2006. Isolation and characterization of a novel lipase from a metagenomic library of tidal flat sediments: evidence for a new family of bacterial lipases. Appl. Environ. Microbiol. <b>72</b> :7406-7409. |
| Turban Basin metagenomic library                        | 1 Pyrethroid-hydrolyzing enzyme | Opt. pH: 6.5<br>Opt Temp.: 55°C<br>Spec. act.: 772.9 $\mu$ molmin <sup>-1</sup> mg <sup>-1</sup> ( <i>p</i> NPC <sub>2</sub> )<br>Relevant properties: the enzyme efficiently degraded cyhalothrin, cypermethrin, sumicidin, and deltamethrin under assay conditions of 37°C for 15 min, with exceeding 95% hydrolysis rate                                                                                                                                                                                                                                                                                                                                                                                                                               | <b>Fan X, Liu X, Huang R, Liu Y.</b> 2012. Identification and characterization of a novel thermostable pyrethroid-hydrolyzing enzyme isolated through metagenomic approach. Microb. Cell Fact. <b>11</b> :33.                                              |
| Marine metagenomic library derived from South China Sea | 2 Esterases                     | Opt. pH: 6.5-7.5<br>Opt Temp.: 45-50°C<br>Spec. act.: up to 981 $\mu$ molmin <sup>-1</sup> mg <sup>-1</sup> ( <i>p</i> NPC <sub>4</sub> )<br>Relevant properties: habitat-specific characteristics such as its high level of stability in the presence of various divalent cations and at high concentrations of NaCl and highly stable in 30% methanol, ethanol, dimethylformamide, and dimethyl sulfoxide.                                                                                                                                                                                                                                                                                                                                              | <b>Chu X, He H, Guo C, Sun B.</b> 2008. Identification of two novel esterases from a marine metagenomic library derived from South China Sea. Appl. Microbiol. Biotechnol. <b>80</b> :615–625                                                              |
| <b>Landfill leachate</b>                                |                                 |                                                                                                                                                                                                                                                                                                                                                                                                                                                                                                                                                                                                                                                                                                                                                           |                                                                                                                                                                                                                                                            |
| Leachate metagenome library                             | 1 Esterase                      | Opt. pH: -<br>Opt Temp.: 30-40°C<br>$K_m$ : 0.0342 mM ( <i>p</i> NPC <sub>8</sub> )<br>$k_{cat}$ : 278.9 s <sup>-1</sup> ( <i>p</i> NPC <sub>8</sub> )<br>$k_{cat}/K_m$ : 8100 s <sup>-1</sup> mM <sup>-1</sup> ( <i>p</i> NPC <sub>8</sub> )<br>Relevant properties: exhibits promiscuous $\beta$ -lactamase activity on nitrocefin; the organic solvent stability and the specificity towards esters of tertiary alcohols linalyl acetate (3,7-dimethyl-1,6-octadien-3-yl acetate) make EstC potentially useful in biocatalysis                                                                                                                                                                                                                         | <b>Rashamuse K, Magomani V, Ronneburg T, Brady D.</b> 2009. A novel family VIII carboxylesterase derived from a leachate metagenome library exhibits promiscuous beta-lactamase activity on nitrocefin. Appl. Microbiol. Biotechnol. <b>83</b> :491–500    |
| Leachate metagenome library                             | 1 Feruloyl esterase             | Opt. pH: 6.5-7.0<br>Opt Temp.: 35°C; thermolabile with a half life < 30 min at 50°C<br>$K_m$ : 0.1 mM ( <i>p</i> NPC <sub>5</sub> )<br>$k_{cat}$ : 46710 s <sup>-1</sup> ( <i>p</i> NPC <sub>5</sub> )<br>$k_{cat}/K_m$ : 592580 s <sup>-1</sup> mM <sup>-1</sup> ( <i>p</i> NPC <sub>5</sub> )<br>$K_m$ : 0.7 mM (methyl sinapinate)<br>$k_{cat}$ : 12159 s <sup>-1</sup> (methyl sinapinate)<br>$k_{cat}/K_m$ : 18851 s <sup>-1</sup> mM <sup>-1</sup> (methyl sinapinate)<br>Relevant properties: high affinity for methyl sinapate, methyl ferulate and ethyl ferulate suggest that the enzyme can be useful in hydrolyzing ferulated poly-saccharides in a biorefinery process                                                                       | <b>Rashamuse K, Sanyika W, Ronneburg T, Brady D.</b> 2012. A feruloyl esterase derived from a leachate metagenome library. BMB Rep. <b>45</b> :14-19                                                                                                       |

## Other samples

|                                                            |                             |                                                                                                                                                                                                                                                                                                                                                                                                                                                                                                                                                                                                                                                                                                                                                                                                                                                                                                                                                                                                                                                              |                                                                                                                                                                                                                                                                                                                        |
|------------------------------------------------------------|-----------------------------|--------------------------------------------------------------------------------------------------------------------------------------------------------------------------------------------------------------------------------------------------------------------------------------------------------------------------------------------------------------------------------------------------------------------------------------------------------------------------------------------------------------------------------------------------------------------------------------------------------------------------------------------------------------------------------------------------------------------------------------------------------------------------------------------------------------------------------------------------------------------------------------------------------------------------------------------------------------------------------------------------------------------------------------------------------------|------------------------------------------------------------------------------------------------------------------------------------------------------------------------------------------------------------------------------------------------------------------------------------------------------------------------|
| China Holstein Cow Rumen                                   | 1 Feruloyl Esterase         | Opt. pH: 8.0<br>Opt Temp.: 40°C<br>K <sub>m</sub> : 1.63 mM (methyl ferulate)<br>k <sub>cat</sub> : 66.46 s <sup>-1</sup> (methyl ferulate)<br>Spec. act.: 259.52 μmolmin <sup>-1</sup> mg <sup>-1</sup> (methyl ferulate)<br>k <sub>cat</sub> /K <sub>m</sub> : 40.84 s <sup>-1</sup> mM <sup>-1</sup> (methyl ferulate)<br>Relevant properties: the enzyme is as a good candidate to enhance biomass degradation and improve the health effects of food and forage                                                                                                                                                                                                                                                                                                                                                                                                                                                                                                                                                                                         | <b>Cheng F, Sheng J, Cai T, Jin J, Liu W, Lin Y, Du Y, Zhang M, Shen L.</b> 2012. A protease-insensitive feruloyl esterase from China Holstein cow rumen metagenomic library: expression, characterization, and utilization in ferulic acid release from wheat straw. <i>J. Agric. Food Chem.</i> <b>60</b> :2546–2553 |
| China Holstein cow rumen                                   | 2 Lipases                   | Opt. pH: 6.5-8.5<br>Opt Temp.: 0-70°C with maximal at 30°C<br>Spec. act.: up to 428 μmolmin <sup>-1</sup> mg <sup>-1</sup> (pNPC8)<br>Relevant properties: the high specificity of both enzymes for long-chain fatty acid make them interesting targets for manipulation of rumen lipid metabolism                                                                                                                                                                                                                                                                                                                                                                                                                                                                                                                                                                                                                                                                                                                                                           | <b>Liu K, Wang J, Bu D, Zhao S, McSweeney C, Yu P, Li D.</b> 2009. Isolation and biochemical characterization of two lipases from a metagenomic library of China Holstein cow rumen. <i>Biochem. Biophys. Res. Commun.</i> <b>385</b> :605-611.                                                                        |
| Cow rumen                                                  | 12 Esterases                | Opt. pH: -<br>Opt Temp.: -<br>Spec. act.: up to 7600 μmolmin <sup>-1</sup> mg <sup>-1</sup> (pNPC2)<br>Spec. act.: up to 9400 μmolmin <sup>-1</sup> mg <sup>-1</sup> (tri-O-acetyl-glucal)<br>Relevant properties: eight were entirely new and formed deep branched phylogenetic lineages with no close relatives among known ester hydrolases                                                                                                                                                                                                                                                                                                                                                                                                                                                                                                                                                                                                                                                                                                               | <b>Ferrer M, Golyshina OV, Chernikova TN, Khachane AN, Reyes-Duarte D, Santos VA, Strompl C, Elborough K, Jarvis G, Neef A, Yakimov MM, Timmis KN, Golyshin PN.</b> 2005. Novel hydrolase diversity retrieved from a metagenome library of bovine rumen microflora. <i>Environ. Microbiol.</i> <b>7</b> :1996-2010.    |
| Noncultured Rumen Bacterium                                | 1 Esterase                  | Opt. pH: 7.0<br>Opt Temp.: 40°C<br>Relevant properties: homology to hypothetical proteins and it had no homology to previous known lipases and esterases.                                                                                                                                                                                                                                                                                                                                                                                                                                                                                                                                                                                                                                                                                                                                                                                                                                                                                                    | <b>Kim MK, Kang TH, Kim J, Kim H, Yun HD.</b> 2012. Cloning and identification of a new group esterase (Est5S) from noncultured rumen bacterium. <i>J. Microbiol. Biotechnol.</i> <b>22</b> :1044–1053                                                                                                                 |
| Cow rumen                                                  | 1 CE6 carbohydrate esterase | Opt. pH: 7.0<br>Opt Temp.: 40°C<br>K <sub>m</sub> : 0.48 mM (pNPC <sub>3</sub> )<br>k <sub>cat</sub> : 1210 s <sup>-1</sup> (pNPC <sub>3</sub> )<br>k <sub>cat</sub> /K <sub>m</sub> : 2520 s <sup>-1</sup> mM <sup>-1</sup> (pNPC <sub>3</sub> )<br>K <sub>m</sub> : 0.91 mM (glucose pentaacetate)<br>k <sub>cat</sub> : 5470 s <sup>-1</sup> (glucose pentaacetate)<br>k <sub>cat</sub> /K <sub>m</sub> : 6010 s <sup>-1</sup> mM <sup>-1</sup> (glucose pentaacetate)<br>K <sub>m</sub> : 0.85 mM (methyl p-coumarate)<br>k <sub>cat</sub> : 950 s <sup>-1</sup> (methyl p-coumarate)<br>k <sub>cat</sub> /K <sub>m</sub> : 1117 s <sup>-1</sup> mM <sup>-1</sup> (methyl p-coumarate)<br>Relevant properties: the catalytic Ser and His have been identified in highly conserved sequences GQSX and DXXH in the CE6 family, respectively, and the active-site glutamate was part of a highly conserved sequence HQGE. This motif is situated near to the so-called Block III in the CE6 family and its role in catalysis has not been identified so far | <b>López-Cortés N, Reyes-Duarte D, Beloqui A, Polaina J, Ghazi I, Golyshina OV, Ballesteros A, Golyshin PN, Ferrer M.</b> 2007. Catalytic role of conserved HQGE motif in the CE6 carbohydrate esterase family. <i>FEBS Lett.</i> <b>581</b> :4657–4662                                                                |
| Symbionts of termite ( <i>Coptotermes formosanus</i> ) gut | 1 Feruloyl esterase         | Opt. pH: 7.0<br>Opt Temp.: 37°C<br>Spec. act.: 24.6 μmolmin <sup>-1</sup> mg <sup>-1</sup> (ethyl ferulate)<br>Relevant properties: -                                                                                                                                                                                                                                                                                                                                                                                                                                                                                                                                                                                                                                                                                                                                                                                                                                                                                                                        | <b>Chandrasekharaiah M, Thulasi A, Bagath M, Kumar DP, Santosh SS, Palanivel C, Jose VL, Sampath KT.</b> 2011. Molecular cloning, expression and characterization of a novel feruloyl esterase enzyme from the symbionts of termite ( <i>Coptotermes</i>                                                               |

|                                                                                            |                      |                                                                                                                                                                                                                                                                                          |                                                                                                                                                                                                                                                                                                         |
|--------------------------------------------------------------------------------------------|----------------------|------------------------------------------------------------------------------------------------------------------------------------------------------------------------------------------------------------------------------------------------------------------------------------------|---------------------------------------------------------------------------------------------------------------------------------------------------------------------------------------------------------------------------------------------------------------------------------------------------------|
|                                                                                            |                      |                                                                                                                                                                                                                                                                                          | <i>formosanus</i> ) gut. BMB Rep. <b>44</b> : 52-57                                                                                                                                                                                                                                                     |
| Fecal samples of <i>Rusa unicolor</i> and <i>Equus burchelli</i>                           | 2 Feruloyl esterases | Opt. pH: 5.0-8.0<br>Opt Temp.: 37°C<br>Spec. act.: up to 16.6 $\mu\text{molmin}^{-1}\text{mg}^{-1}$ (methyl ferulate)<br>Relevant properties: -                                                                                                                                          | <b>Chandrasekharaiah M, Thulasi A, Vijayarami K, Kumar DP, Santosh SS, Palanivel C, Jose VL, Sampath KT.</b> 2012. Expression and biochemical characterization of two novel feruloyl esterases derived from fecal samples of <i>Rusa unicolor</i> and <i>Equus burchelli</i> . Gene <b>500</b> :134–139 |
| Marine sponge <i>Haliclona simulans</i>                                                    | 1 Lipase             | Opt. pH: 3.0-12.0<br>Opt Temp.: 4-60°C<br>Km: .093 mM (pNPC16)<br><i>Vmax</i> : 50 $\mu\text{molmin}^{-1}$ (pNPC <sub>16</sub> )<br>Relevant properties: high levels of stability in the presence of various solvents at NaCl concentrations as high as 5 M                              | <b>Selvin J, Kennedy J, Lejon DP, Kiran S, Dobson AD.</b> 2012. Isolation identification and biochemical characterization of a novel halo-tolerant lipase from the metagenome of the marine sponge <i>Haliclona simulans</i> . Microb. Cell Fact. <b>11</b> :72.                                        |
| Microbial community in the pitcher fluid of the carnivorous plant <i>Nepenthes hybrida</i> | 2 Lipases            | Opt. pH: acidic conditions (5.0-6.0)<br>Opt Temp.: -<br>Relevant properties: capable of enzymatic activity in the acidic pitcher fluid.                                                                                                                                                  | <b>Morohoshi T, Oikawa M, Sato S, Kikuchi N, Kato N, Ikeda T.</b> 2011. Isolation and characterization of novel lipases from a metagenomic library of the microbial community in the pitcher fluid of the carnivorous plant <i>Nepenthes hybrida</i> . J. Biosci. Bioeng. <b>112</b> :315-320.          |
| Marine sponge-associated bacteria                                                          | 1 Esterase           | Opt. pH: alkaline pH<br>Opt Temp.: 30-50°C<br>Spec. act.: 5.6 $\mu\text{molmin}^{-1}\text{mg}^{-1}$ (pNPC2)<br>Relevant properties: maintained activity in high concentrations of NaCl (up to 4M), indicating salt-tolerance; however, it showed maximal activity in the absence of salt | <b>Okamura Y, Kimura T, Yokouchi H, Meneses-Osorio M, Katoh M, Matsunaga T, Takeyama H.</b> 2010. Isolation and characterization of a GDSL esterase from the metagenome of a marine sponge-associated bacteria. Mar. Biotechnol. <b>12</b> :395–402                                                     |
| Salted shrimp                                                                              | 1 Esterase           | Opt. pH: -<br>Opt Temp.: -<br>Spec. act.: 1344 $\mu\text{molmin}^{-1}\text{mg}^{-1}$ (pNPC4)<br>Relevant properties: Comparison of the sequences revealed a very low sequence similarity (<5-11%) to those of established esterase family enzymes                                        | <b>Park SY, Shin HJ, Kim GJ.</b> 2011. Screening and identification of a novel esterase EstPE from a metagenomic DNA library. J. Microbiol. <b>49</b> :7-14.                                                                                                                                            |

**Table S2** List of primers used in the study.

| <b>Name</b> | <b>Sequence</b>                        |
|-------------|----------------------------------------|
| LAE1Fwd     | 5'-GACGACGACAAGATG AACAGGATTGCC-3'     |
| LAE1Rev     | 5'-GAGGAGAAGCCCGGTCAGTGGTGATTCTTCG-3'  |
| LAE2Fwd     | 5'-GACGACGACAAGATGAGCAATTCTTTGAACTG-3' |
| LAE2Rev     | 5'-GAGGAGAAGCCCGGTTAGCGCCCGCCGGCGC-3'  |
| LAE3Fwd     | 5'-GACGACGACAAGATGGCTAGCGCCGAGGC-3'    |
| LAE3Rev     | 5'-GAGGAGAAGCCCGGTCATGGGGCGCTGGGGC-3'  |
| LAE4Fwd     | 5'-GACGACGACAAGATGCGACATTCCATATCTC-3'  |
| LAE4Rev     | 5'-GAGGAGAAGCCCGGTTACTTGGTTTGTGGG-3'   |
| LAE5Fwd     | 5'-GACGACGACAAGATGTATTTTCGCAGCTGGC-3'  |
| LAE5Rev     | 5'-GAGGAGAAGCCCGGTTAGCTATTCAGGCAGC-3'  |
| LAE6Fwd     | 5'-GACGACGACAAGATG CTGCTGCCCGAGACC-3'  |
| LAE6Rev     | 5'-GAGGAGAAGCCCGGTTACGTCCCGAAGTGCGC-3' |
| LAE7Fwd     | 5'-GACGACGACAAGATGCATTTCTTCGATCACG-3'  |
| LAE7Rev     | 5'-GAGGAGAAGCCCGGTTAAGGACGCGCGCC-3'    |

**Table S3** Percentage of identity between Arreo enzymes, determined by Matcher (EMBOSS package). Matches/alignment lengths (% identity) are specifically shown.

|             | <b>LAE1</b>  | <b>LAE2</b>   | <b>LAE3</b>   | <b>LAE4</b>  | <b>LAE5</b>  | <b>LAE6</b>   | <b>LAE7</b>   |
|-------------|--------------|---------------|---------------|--------------|--------------|---------------|---------------|
| <b>LAE1</b> |              | 9/31 (29.0%)  | 3/31 (41.9%)  | 2/39 (30.8%) | 5/10 (50.0%) | 2/27 (44.4%)  | 1/18 (61.1%)  |
| <b>LAE2</b> | 9/31 (29.0%) |               | 3/51 (25.5%)  | 9/19 (47.4%) | 6/43 (37.2%) | 8/18 (44.4%)  | 4/292 (59.6%) |
| <b>LAE3</b> | 3/31 (41.9%) | 3/51 (25.5%)  |               | 8/22 (36.4%) | 4/42 (33.3%) | 3/207 (30.4%) | 3/48 (27.1%)  |
| <b>LAE4</b> | 2/39 (30.8%) | 9/19 (47.4%)  | 8/22 (36.4%)  |              | 0/38 (26.3%) | 9/48 (39.6%)  | 5/7 (71.4%)   |
| <b>LAE5</b> | 5/10 (50.0%) | 6/43 (37.2%)  | 4/42 (33.3%)  | 0/38 (26.3%) |              | 4/22 (18.2%)  | 5/43 (34.9%)  |
| <b>LAE6</b> | 2/27 (44.4%) | 8/18 (44.4%)  | 3/207 (30.4%) | 9/48 (39.6%) | 4/22 (18.2%) |               | 1/33 (33.3%)  |
| <b>LAE7</b> | 1/18 (61.1%) | 4/292 (59.6%) | 3/48 (27.1%)  | 5/7 (71.4%)  | 5/43 (34.9%) | 9/37 (24.3%)  |               |

**Table S4** Half-saturation (Michaelis) coefficient ( $K_m$ ), the catalytic rate constant ( $k_{cat}$ ) and the catalytic efficiency ( $k_{cat}/K_m$ ) values for the wild-type  $\alpha/\beta$  hydrolases from Lake Arreo. Kinetic parameters were calculated at 30°C as outlined in Table 1 and Materials and Method section in 96-well microtiter plate where each well contained 0.388-0.882  $\mu$ M enzyme solution and 0-100 mM substrate. For kinetic parameters determinations (performed in triplicate) a conventional Lineweaver and Burk model was used. Standard deviations (SD) are given.

|                                   | $K_m$ (mM) | SD $K_m$ (mM) | $k_{cat}$ ( $\text{min}^{-1}$ ) | SD $k_{cat}$ ( $\text{min}^{-1}$ ) | $k_{cat}/K_m$ ( $\text{min}^{-1}\text{mM}^{-1}$ ) |
|-----------------------------------|------------|---------------|---------------------------------|------------------------------------|---------------------------------------------------|
| <b>LAE1</b>                       |            |               |                                 |                                    |                                                   |
| <i>p</i> NP acetate               | 0.66       | 0.05          | 2.7                             | 0.3                                | 4.1                                               |
| <i>p</i> NP propioante            | 0.29       | 0.02          | 6.2                             | 0.7                                | 21.4                                              |
| <i>p</i> NP butyrate              | 0.13       | 0.02          | 32.5                            | 0.9                                | 250                                               |
| <i>p</i> NP octanoate             | 0.08       | 0.05          | 3.4                             | 0.3                                | 42.5                                              |
| <i>p</i> NP decanoate             | 0.02       | 0.02          | 0.6                             | 0                                  | 30.0                                              |
| Phenyl acetate                    | 0.63       | 0.01          | 3.6                             | 0.4                                | 5.7                                               |
| Triacetin                         | 16.9       | 0.4           | 2                               | 1.5                                | 0.1                                               |
| Tripropionin                      | 0.32       | 0.18          | 10.7                            | 26.3                               | 33.4                                              |
| Tributyryn                        | 0.29       | 0.01          | 6.2                             | 0.6                                | 21.4                                              |
| Methyl-(R)-(-)-mandelate          | 3.58       | 0.15          | 9.0                             | 3.3                                | 2.5                                               |
| Methyl-(S)-(+)-mandelate          | 37.4       | 2.8           | 10.8                            | 4.2                                | 0.3                                               |
| Methyl $\alpha$ -bromoisobutyrate | 0.65       | 0.01          | 4.3                             | 0.5                                | 6.6                                               |
| Methyl 2-bromopropionate          | 8.58       | 0.69          | 25.2                            | 2                                  | 2.9                                               |
| Methyl bromoacetate               | 3.33       | 0.44          | 14.8                            | 0.7                                | 4.4                                               |
| $\alpha$ -D-Glucose pentaacetate  | 7          | 0.28          | 13.9                            | 1.4                                | 2.0                                               |
| Tri-O-acetyl-D-glucal             | 0.21       | 0.03          | 29.5                            | 0.7                                | 140                                               |
| <b>LAE2</b>                       |            |               |                                 |                                    |                                                   |
| <i>p</i> NP acetate               | 0.12       | 0.04          | 166                             | 15.6                               | 1383                                              |
| <i>p</i> NP propioante            | 0.04       | 0.01          | 11.7                            | 0.9                                | 293                                               |
| <i>p</i> NP butyrate              | 0.1        | 0.03          | 2.7                             | 0.3                                | 27.0                                              |
| Phenyl acetate                    | 0.17       | 0.04          | 89.3                            | 0.9                                | 525                                               |
| Triacetin                         | 0.06       | 0.02          | 4.3                             | 0.1                                | 71.7                                              |
| Methyl 4-bromobenzoate            | 21.5       | 0.5           | 22.4                            | 1.9                                | 1.0                                               |
| $\alpha$ -D-Glucose pentaacetate  | 0.42       | 0.09          | 3.5                             | 0.3                                | 8.3                                               |
| Tri-O-acetyl-D-glucal             | 0.41       | 0.09          | 3.5                             | 0.4                                | 8.5                                               |
| <b>LAE3</b>                       |            |               |                                 |                                    |                                                   |
| <i>p</i> NP acetate               | 0.55       | 0.03          | 346                             | 9.1                                | 629                                               |
| <i>p</i> NP propioante            | 1.07       | 0.16          | 10.2                            | 0.3                                | 9.5                                               |
| <i>p</i> NP butyrate              | 0.46       | 0.11          | 25.8                            | 0.5                                | 56.1                                              |
| <i>p</i> NP octanoate             | 0.2        | 0.26          | 1.1                             | 0.1                                | 5.5                                               |
| Triacetin                         | 11.2       | 3.7           | 1265                            | 39.6                               | 113                                               |
| Tripropionin                      | 6.7        | 0.3           | 1631                            | 39                                 |                                                   |



|                                            |       |       |      |       |       |
|--------------------------------------------|-------|-------|------|-------|-------|
| Tributyrin                                 | 2.94  | 0.28  | 36.5 | 0.3   | 12.4  |
| Methyl-(R)-(-)-mandelate                   | 0.82  | 0.03  | 1004 | 25.2  | 1224  |
| Methyl-(S)-(+)-mandelate                   | 21    | 1.1   | 32.5 | 5     | 1.5   |
| Methyl 4-bromobenzoate                     | 0.28  | 0.12  | 7.1  | 0.7   | 25.4  |
| Methyl 2-bromopropionate                   | 1.88  | 0.18  | 80.3 | 5.6   | 42.7  |
| $\alpha$ -D-Glucose pentaacetate           | 0.57  | 0.02  | 52.4 | 0.9   | 91.9  |
| Tri-O-acetyl-D-glucal                      | 3.4   | 0.01  | 132  | 19.2  | 38.8  |
| Methyl <i>p</i> -coumarate                 | 0.6   | 0.02  | 10.3 | 3.1   | 17.2  |
| <b>LAE4</b>                                |       |       |      |       |       |
| <i>p</i> NP acetate                        | 0.03  | 0.01  | 1.9  | 0.1   | 63.3  |
| <i>p</i> NP propioante                     | 0.004 | 0.002 | 4.2  | 0.3   | 1050  |
| <i>p</i> NP butyrate                       | 0.02  | 0.01  | 4    | 0.1   | 200   |
| Phenyl acetate                             | 2.59  | 0.83  | 215  | 12.5  | 83.0  |
| Triacetin                                  | 0.79  | 0.07  | 1005 | 75    | 1272  |
| Tripropionin                               | 0.78  | 0.08  | 2333 | 41.5  | 2991  |
| Methyl-(S)-(-)-mandelate                   | 3.82  | 0.37  | 2.2  | 0.2   | 0.6   |
| Methyl-(R)-(+)-mandelate                   | 11.4  | 0.4   | 3.6  | 0.2   | 0.3   |
| Methyl 4-bromobenzoate                     | 1.21  | 0.07  | 114  | 22.9  | 94.2  |
| Methyl <i>p</i> -coumarate                 | 17    | 0.5   | 986  | 64.1  | 58.0  |
| <b>LAE5</b>                                |       |       |      |       |       |
| <i>p</i> NP acetate                        | 0.09  | 0.03  | 35.9 | 0.9   | 399   |
| <i>p</i> NP propioante                     | 0.03  | 0.01  | 45.7 | 5     | 1523  |
| <i>p</i> NP butyrate                       | 0.21  | 0.07  | 0.3  | 0     | 1.4   |
| Phenyl acetate                             | 0.25  | 0.11  | 896  | 126   | 3584  |
| Propyl acetate                             | 11.4  | 3.3   | 32.3 | 0.8   | 2.8   |
| Geranyl acetate                            | 20.6  | 9     | 2.9  | 0.4   | 0.1   |
| Triacetin                                  | 0.08  | 0.03  | 88.8 | 5.9   | 1110  |
| Methyl 4-bromobenzoate                     | 2.51  | 0.2   | 74.9 | 0.2   | 29.8  |
| Methyl bromoacetate                        | 0.57  | 0.02  | 5.7  | 0.8   | 10.0  |
| $\alpha$ -D-Glucose pentaacetate           | 0.53  | 0.03  | 1418 | 35.4  | 2676  |
| Tri-O-acetyl-D-glucal                      | 0.38  | 0.03  | 1108 | 25.8  | 2916  |
| Methyl sinapinate                          | 1.65  | 0.06  | 3.3  | 4.7   | 2.0   |
| <b>LAE6</b>                                |       |       |      |       |       |
| <i>p</i> NP acetate                        | 0.58  | 0.04  | 1229 | 154.4 | 2119  |
| <i>p</i> NP propioante                     | 0.26  | 0.01  | 4544 | 605.2 | 17500 |
| <i>p</i> NP butyrate                       | 0.83  | 0.03  | 2999 | 165.2 | 3613  |
| <i>p</i> NP octanoate                      | 0.33  | 0.03  | 122  | 6.8   | 370   |
| <i>p</i> NP decanoate                      | 0.09  | 0.01  | 34.8 | 1.4   | 387   |
| <i>p</i> NP laurate                        | 0.19  | 0.97  | 6.7  | 0.2   | 35.3  |
| Phenyl acetate                             | 0.08  | 0.02  | 266  | 9.5   | 3325  |
| Propyl acetate                             | 3.21  | 0.47  | 2.8  | 0.3   | 0.9   |
| Ethyl benzoate                             | 0.5   | 0.03  | 0.7  | 0.2   | 1.4   |
| Ethyl butyrate                             | 8.84  | 0.22  | 8.7  | 20.3  | 1.0   |
| Triacetin                                  | 0.25  | 0.05  | 60.1 | 3.8   | 240   |
| Tripropionin                               | 0.24  | 0.04  | 600  | 31.8  | 2500  |
| Tributyrin                                 | 0.49  | 0.15  | 77.5 | 10.7  | 158   |
| Methyl (+/-)- $\alpha$ -bromophenylacetate | 0.35  | 0.01  | 21.5 | 2.6   | 61.4  |
| Methyl $\alpha$ -bromoisobutyrate          | 2.39  | 0.16  | 18.1 | 0.9   | 7.6   |
| Methyl 4-bromobenzoate                     | 0.31  | 0.08  | 32.6 | 3.2   |       |

|                                   |      |      |      |      |      |
|-----------------------------------|------|------|------|------|------|
| Methyl bromoacetate               | 0.2  | 0.02 | 558  | 13.9 | 2790 |
| Tri-O-acetyl-D-glucal             | 0.36 | 0.09 | 33.7 | 3.4  | 93.6 |
| Methyl cinnamate                  | 0.21 | 0.03 | 57   | 5.4  | 271  |
| Methyl <i>p</i> -coumarate        | 0.57 | 0.06 | 7.1  | 0.3  | 12.5 |
| (R)-(-)-Glycidyl butyrate         | 0.04 | 0.01 | 64.8 | 1    | 1620 |
| (S)-(+)-Glycidyl butyrate         | 0.52 | 0.03 | 58.0 | 1.2  | 112  |
| $\gamma$ -Butyrolacton            | 0.38 | 0.02 | 57.6 | 0.8  | 152  |
| <b>LAE7</b>                       |      |      |      |      |      |
| <i>p</i> NP acetate               | 0.05 | 0.02 | 29.1 | 3.3  | 582  |
| <i>p</i> NP propioante            | 0.03 | 0.02 | 5.1  | 0.1  | 170  |
| <i>p</i> NP butyrate              | 0.05 | 0.01 | 0.8  | 0    | 16.0 |
| Phenyl acetate                    | 0.41 | 0.02 | 3.8  | 1.4  | 9.3  |
| Triacetin                         | 0.28 | 0.04 | 34.9 | 1.7  | 125  |
| Tributyryn                        | 1.17 | 0.27 | 4    | 0.2  | 3.4  |
| Methyl 4-bromobenzoate            | 0.1  | 0.06 | 0.8  | 0.1  | 8.0  |
| Methyl $\alpha$ -bromoisobutyrate | 1.62 | 0.21 | 33.1 | 1.9  | 20.4 |
| $\alpha$ -D-Glucose pentaacetate  | 2.53 | 0.11 | 6.7  | 2.3  | 2.6  |
| Tri-O-acetyl-D-glucal             | 1.53 | 0.13 | 44.8 | 2    | 29.3 |

**FIG S1** Location map (a), vegetation and use of drainage basin (b) and bathymetric map (c) of Lake Arreo. Sampling point is indicated by an asterisk. The map has been generated based on bathymetric studies previously published (ref. 13 and 52 in main text). Location map in (a) was made with the Geographic data sets found on the ESRI Data&Maps Kit of the SIG ArcGis 9.2 software. The limit of the drainage basin in (b) was established based on 1:25.000 maps of the digital cartographic base from the National Geographic Institute (*Instituto Geográfico Nacional de España*). The information was analyzed using the ArcGis 9.2 software. The correct establishment of the limit was further validated based on in situ measurements using topographic-geographic instrumentations (the digital free access information is available at the following URL “<http://centrodedescargas.cnig.es/CentroDescargas>”, as established in the *Orden FOM/956/2008*, dated on 31<sup>th</sup> March 2008 [BOE 8<sup>th</sup> April 2008]). The vegetation map was generated based on the photo-interpretation of the orthophotos “PNOA © *Instituto Geográfico Nacional de España – Basque Country (Gobierno Vasco)*”. The correct assignment of the vegetation units was established based on in situ visit to the studied area. To perform the bathymetric map (c) of Lake Arreo, an aerial photo obtained by *Diputación Foral de Álava* (1992) was used. The field study was performed in 1994, using a boat with electric engine and an ecosonda Furuno FE-4300 or a surveying rod. The obtained values were referenced and digitally treated using specific software (ArcGis v9.2 and Surfer v7.00). Further modifications and validations were done based on up-dated ortho-images.

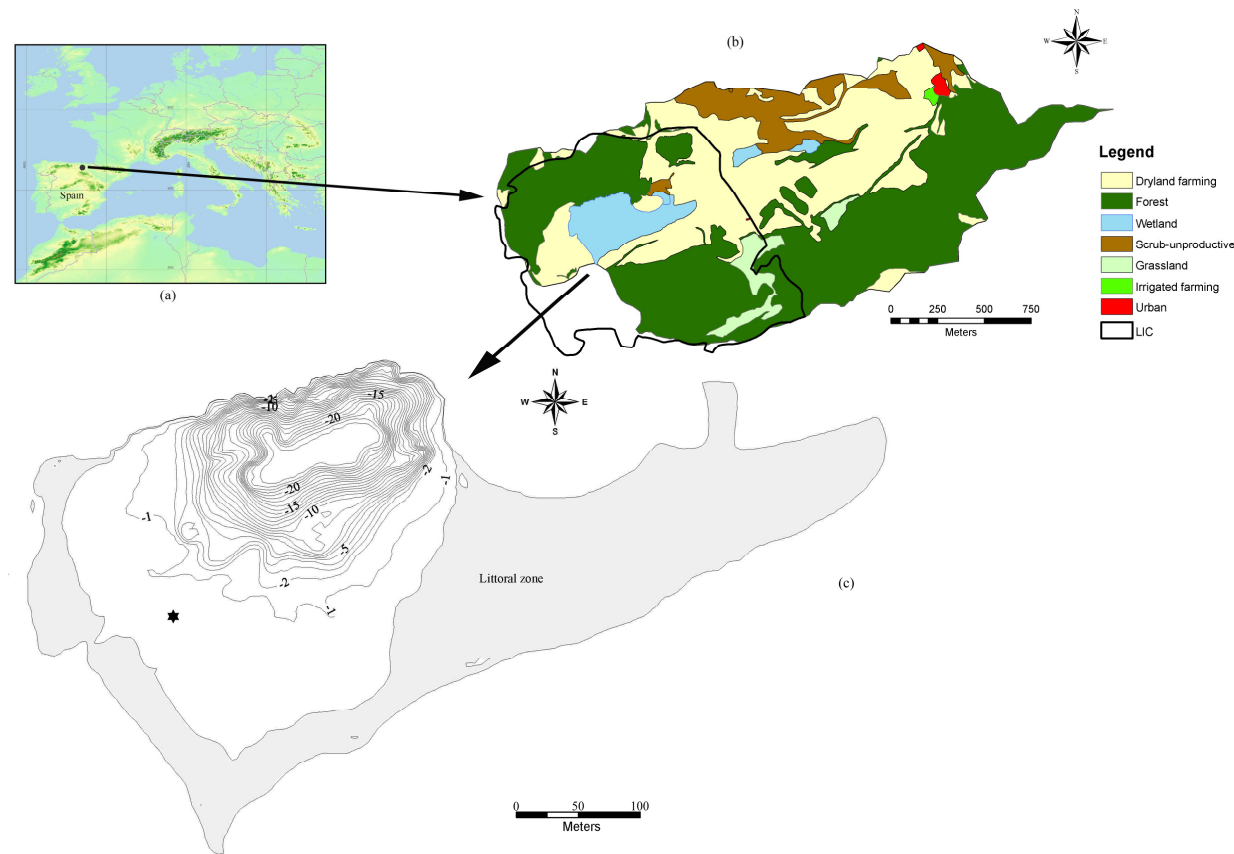

**FIG S2** Lake Arreo proteins, as overexpressed in the active form in *E. coli* at 16°C. A Coomassie-stained SDS-PAGE gel showing the expression level of the Lake Arreo proteins is shown. As shown, a high percentage of protein is produced in a soluble form, which resulted in a purity higher than 98% after a single His<sub>6</sub>-tag purification step. Abbreviation: MW, molecular weight marker.

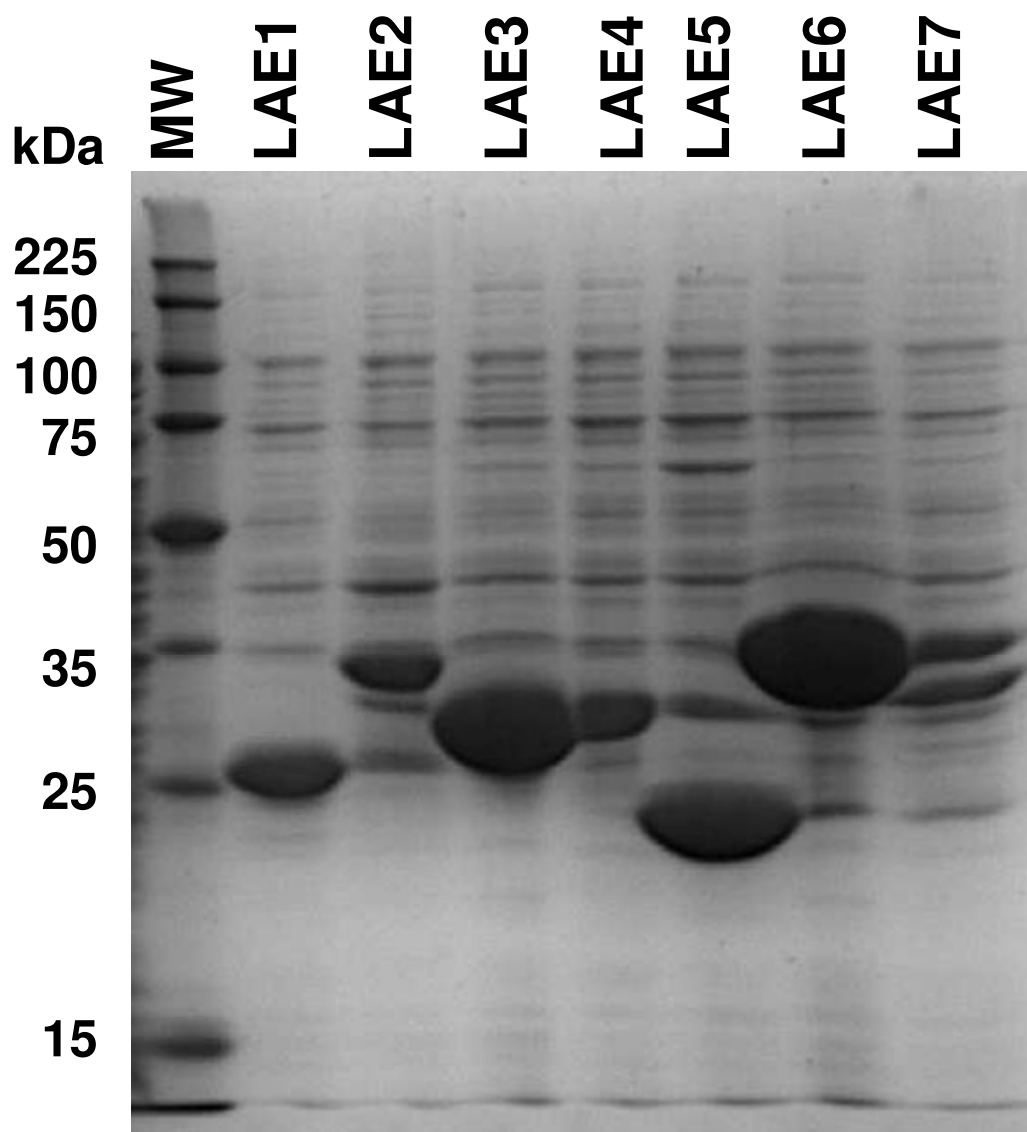

**FIG S3** Chemical structures of substrates applied for activity profiling of esterases/lipases preparations used in the present study. Note: ethyl 2-methylacetoacetate, ethyl 4-chloroacetoacetate, ethyl (R)-(-)-3-hydroxybutyrate, ethyl propionate, ethyl acetate, ethyl hexanoate, ethyl 2-chloropropionate, ethyl caprate, ethyl 4-hydroxy-3-methoxycinnamate, methyl propionate, methyl 2,2-dimethyl-3-hydroxypropionate, methyl (S)-(+)-3-hydroxybutyrate, methyl (R)-(+)-3-bromo-2-methylpropionate, (-)-methyl L-lactate, (+)-methyl D-lactate, methyl 4-(hydroxymethyl)benzoate, methyl pyruvate, methyl acetoacetate, methyl 2-hydroxyisobutyrate, methyl (S)-(+)-3-hydroxy-2-methylpropionate, tert-butyl 3-hydroxypropionate, isobutyl acetate, vinyl pivalate, vinyl methacrylate, vinyl crotonate, vinyl acetate, vinyl propionate, vinyl laurate, vinyl butyrate, glycine ethyl ester, (1S)-(+)-menthyl acetate, (1R)-(-)-menthyl acetate, (1S)-(+)-neomenthyl acetate, (1R)-(-)-neomenthyl acetate, were not used as substrates by any of the enzymes.

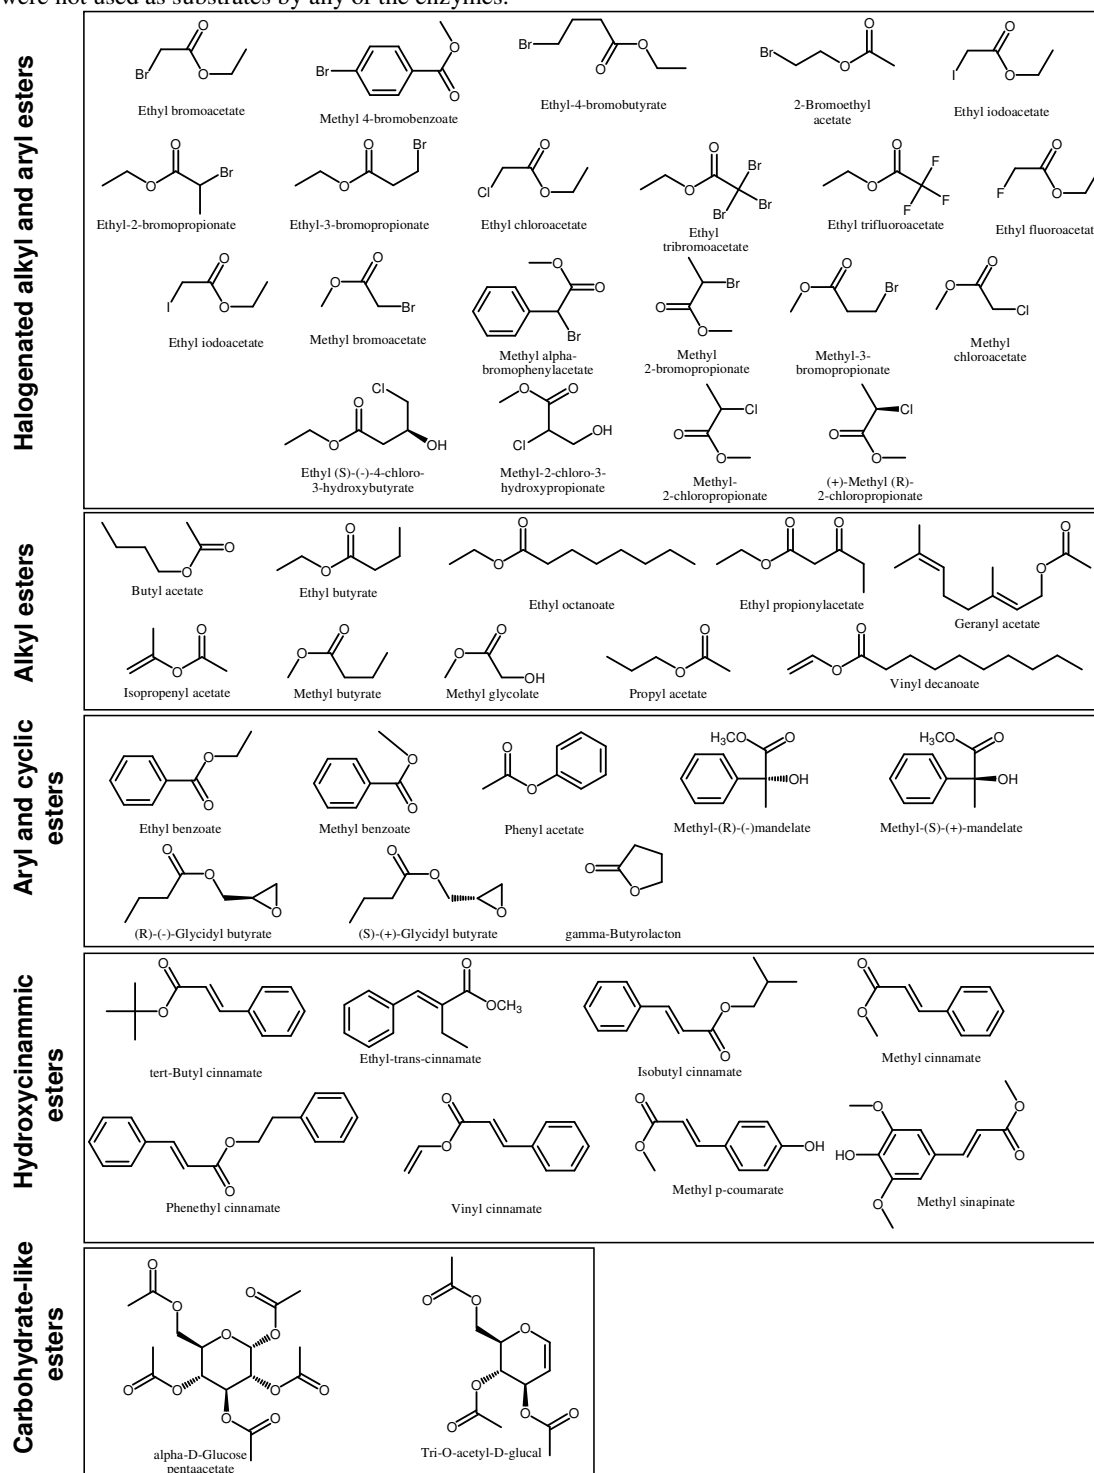

**FIG S4 Structural models of esterases/lipases from the  $\alpha/\beta$  hydrolase family characterised in this work. Residues belonging to the catalytic core are explicitly shown as follows: LAE1 (A), LAE2 (B), LAE3 (C), LAE4 (D), LAE5 (E), LAE6 (F), and LAE7 (G).**

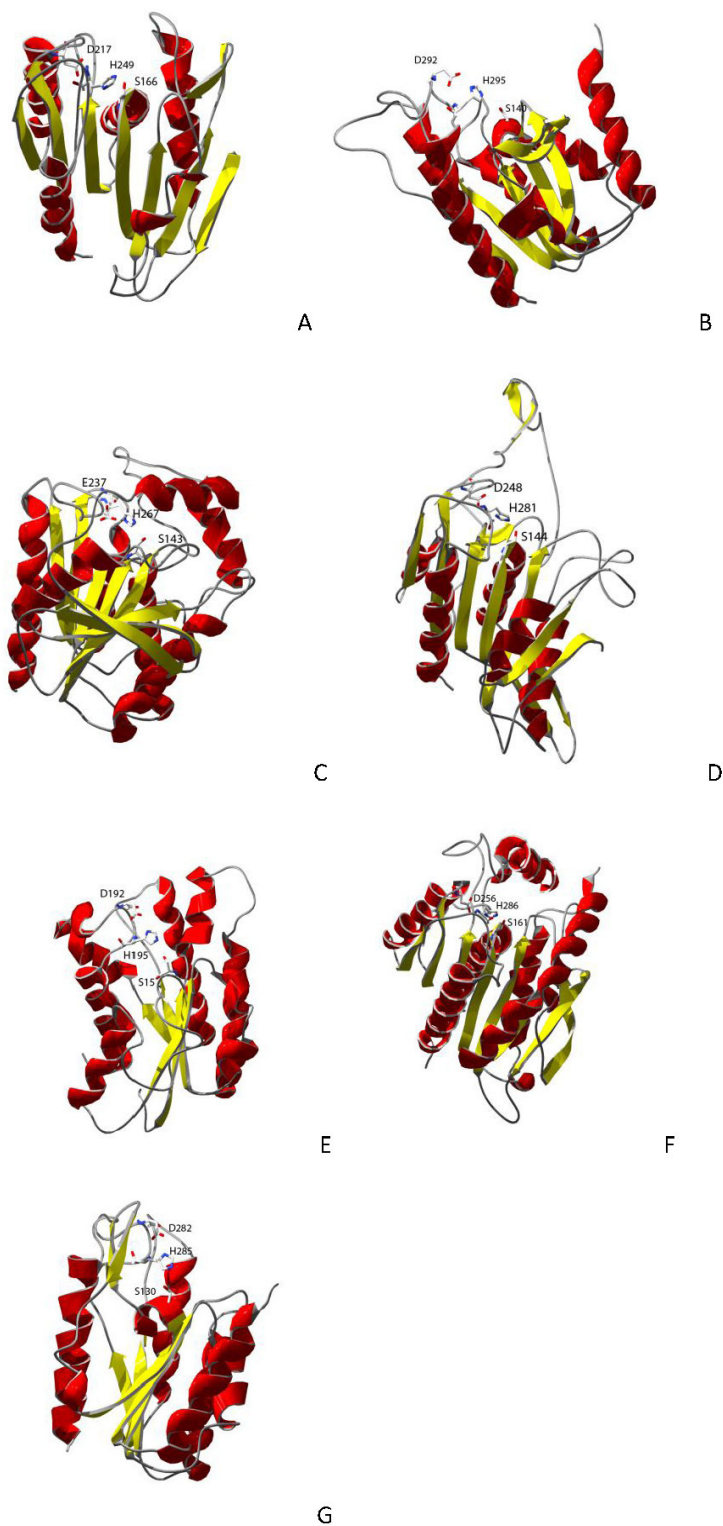

## ANNEX:

Fosmid DNA isolated from each clone was sequenced as a pool using a Roche GS FLX DNA sequencer (1/16 plate), which produced 77,841 reads with an average length per read of 454.69 bp. Accordingly, a total of 38.5 Mbp of raw DNA sequences were obtained, which were assembled into 735,686 bp (19 contigs with length ranging from 1,854 to 43,416 bp.

**Sequences are available at NCBI under accession number SRA059294.** A total number of 378 open reading frames were identified. Their amino acid and nucleotide sequences are described below. Seven genes encoding experimentally characterized esterases/lipases in this study, herein named LAE1 to LAE7, were identified and their sequences are given below:

### **LAE1 gene sequence**

```
GTGAACAGGATTGCCGGGCTGTGCGTGCTGGCAGCCACGATGCAAGGCATCGGCTCCTCG
CCGGCGCATGCACAGCAAGCCGCACCCGGCGAGCAAGCCGCCAGCTTCGGGGCGCAGTTC
GGGCCGGTGCACCCGCGCTCGAGATGCGGACCTACGTGTTTGACAGACACCGGTGAAAGG
ATTCCCTACGGCGTGTTCGTCTCTTCCAGCGTCACCATGGAGCGCAAGGCACCGCTGGTC
GTGGCGCTGCACGGGCTGGGCGCATCACAGGAATCCATGGTCCGCACCCAGCTTCCGCGCT
GTCGAGCTGGCGGAAAAAGGCGGGTACATCCTGGTGGTACCGCTGGGGTACAACAGCAGC
GGCTGGTACGGCGTCCAGGCTGGCGGCAGCGTGCAGCAGCAGCGAGTACAGCGAAAAAG
GACGTCATGAACGTGCTGGCGATGGTGCAGGATGAGTTCAACATAGATGACGATCGCATC
TTCCTGATGGGTCAATTCGATGGGCGGTGCGGGCACATTGCACCTGGGCATGAAATACCCC
TCCATCTGGGCCGCCCTGGCGCCCATCGCGCCCGCCACTGCAGCTCTGGATCCGGACTCG
CTGGCCTCGATCCGCCACATGCCGGTGATCATCGTGCAGGGCGACCGGGACACGGCCGTT
CCGTTGCCGTCACGCGGCGCTGGGCTTCCAACTCCGGGAAGTGCAGATGACCTTCCGC
TACATCGAAATTCCGGGCGGCGATCACATGGGCGTGATCGGCACGGGCATGCCGGACATC
TTCGCGTTCTTCGAGGCACACCCGAAGAATCACCACTGA
```

### **LAE1 protein sequence**

```
VNRIAGLCVLAATMQGIGSSPAHAQQAAPGEQAASFQAQFGPVDPRVEMRTYVFADTGER
IPYGVFVSSSVTMRKAPLVVALHGLGASQESMVRTSFRAVELAEKGGYILVVPLGYNSS
GWYGVQAGGSVQQQREYSEKDVMMNVLAMVRDEFNIDDDRIFLMGHSMGGAGTLHLGMKYP
SIWAALAPIAPATAALDPDSLASIRHMPVIIVQGDADTAVPVAVTRRWASKLRELQMTFR
YIEIPGGDHMGVIGTGMPDIFAFFEAHPKNHH
```

### **LAE2 gene sequence**

```
ATGAGCAATTCTTTGAACTGCGCAGCAAGCGCATGCCTGCCGCCCGCAACCTGCTGACC
GCCCTGCTGCTGGCCACAACCTTGCAGCGCGCTCGCGCAGGTAGGCCCTGGCGGCCCGGGT
GGTCCGCGTGGCGGTGGTTTTTGGCGCTCCGCCACTCCGCCGGGACCGGCTGCCGAGGTA
CCCGCCGCGGTGCGCATGGCACGCCCCACCGCTGCCGAAGTGGCCTCGGTCCGCGCCAGC
GTCGACAAGCTCGACCTGGCGAAGAAGTATCCGGGCTGGTGCAGATCAATGTGCTGCG
CCCATGAGCGGAGAACACGGCCATCCGGCCGTGCTGTCCGGCGGGTCCAGCAGAAGCAC
CAGGACAACCTGGCAGTGGCGAAGCAGGGCGACGCCGAAGTGTGTTTCATGGGTGATTCC
ATCACCGACTGGTGGCGCAGCGAGACCGGCACCAACGCCGGCAAGGCCGTGCAGGACAAG
TACTTCGGCCAGTGGAAAGGTGGCGAACTTCGGTATCGCCGGCGACACCACGCAGGGCGTG
CTCTACCCGCTGCAGAACGGCGAAGGCAAGGGCTTCAAGCCCAAGGCCGTCATGCTGATG
ATCGGCACCAACAATACGGGCCGAATTCCGCGGCGAGATCGCCGAGGGTGTGCGGTGCC
GTGGTCTGCTGAGCTGCAGAAGGATTTCCCGGACGCGCGTATCCTGCTGCTGGCCATCTTC
```

CCGCGTGGCAATCCGGGCGACGCGGCGCGGCCACCATTGCCAGATCAACGACACCATC  
AAGAAGCTGGATGACGGCAAGAAGGTGTTCTACATGGACATCGGCAGGAACCTCCTCGAC  
GCCAGCGGCGGATACCGCGGAGATCATGGGCGATGGACTGCATCCCACCACGGCGGGC  
TACGAGATCTGGGCCAAGGGGTCATCGATCCCATCACGGCGATGATGAACGGCCGCGCG  
CCGGCCGGCCGCTAA

**LAE2 protein sequence**

MSNSLELRSKRMPAARNLLTALLLATTTCGALAQVGPGGPGRGGFGAPPTPPGPAAEV  
PAAVRMARPTAAEVASVRASVDKLDLAKKYPGLVQINVPAPMSENTAIRPSLSGGFQQKH  
QDNLAVAKQGDALLFMGDSITDWRSETGTNAGKAVQDKYFGQWKVANFGIAGDTTQGV  
LYRLQNGEGKGFKPKAVMLMIGTNNTGRNSAGEIAEGVGAUVLQLQKDFPDARILLLAIF  
PRGNPGDAARGTIAQINDTIKKLDDGKKVYMDIGRNFILDASGAIPREIMDGLHPTTAG  
YEIWAKAVIDPITAMMNGRAPAGR

**LAE3 gene sequence**

ATGGCTAGCGCCGAGGCTTTGAAGATGATGGCGGAGCTGCGGGCGAACCGAAAGCCGGAT  
CGGCCGCTTGCACAGGCTCGCGCCGAATGGGACATCGAAGCGGCTGCCAGGCGCTGCCG  
GCGGAGACCGTGGTCGAACCCGGCCAGATGGGCGGGTGCCTCGGAGTGGATCGTGTGC  
GGTCCGGTGATCGAGCGTGGCGTCTGTGCTGTGCTGCATGGTGGCGGTTACCACGCCGGC  
GGGTGGTGACCCATCGCGCCTTCGCAGCCCGGCTCTCGCGCGCGCTCGGGCGGGGTA  
TTGCAGATTGCCTATGCTCTTGCCTCGGAGCATCCCTTTCCGGCCGGGCTGCATGATGCT  
CTGGCGGCTACAAGCGCTGATCGCCGAAGCGTCTGCCCGGCGAAATCGTCCTGCTC  
GGGACAGCGCCGGGGCGGACTGGCCATTTCTGTTGATGCTGGCCCTCAAACGCGACGGC  
GACCCGACGCCGGCGGTGCGGTGCTCCTGTCGCGGTGGACCGATCTCGAATGCTCGGGC  
ACCAGCTATCGGACGAACCTTTCGCGCGATCCCAACATGTCGCGCGAAGATCTGCTGGCG  
GCAGCGGACGACTATCGCGGCAGCCTGCCGGCAAGCGAGCCGATGCTGTCCCCCATCCAT  
GCCGACCTGTCCGGCTGCCGCCATGCTCGTCCAGGCGGGTGGCGGGGAGATCATGCTC  
GACGATTCGATCTTTTTGCCGAGCAGGCTCGCACCACCGGCTGCCGTGTGACGCTCGAC  
GTGACGCCCGATCTCTGGCAGTCTTCCAGAACGACCCGACGACATTCGGAGGTGAGG  
GCGGCCTTCGACCGCATGGGGACCTTCGTTGCCGGGTGATGGCCCGCCCGAGCGCCCA  
TGA

**LAE3 protein sequence**

MASAEALKMMAELRANRKPDRPLAQARAEDIEAAAQALPAETVVEPGQMGVASEWIVC  
GPVIERGVVLLHGGGYHAGGLVTHRAFAARVSRALGRRVLQIAYALAPEHFPFAGLHDA  
LAAYKALIAEGVVPGEIVLLGDSAGGLAISLMLALKRDGPQAGAVLLSPWTDLECSG  
TSYRTNLSRDPNMSREDLLAAADDYRGSPLPASEPMLSPIHADLSGLPPMLVQAGGGEIML  
DDSIFFAEQARTTGRVTLDVTPDLWHVFQNGPDDIPEVRAAFDRMGTFFVAGVMARPSAP

**LAE4 gene sequence**

ATGCGACATTCCATATCTCTCGTATTCTGGTTGCCCTGGCCGCGCTGCCGTGGGCTTGT  
CTTGCCGCGGAGGATGACAAAGCGCCGGACGTCGCCCGCACGGAAGACGTGATCTACGGC  
CGAAAATCGGGCATGGCTTTGACGATGGACGCTTCCAGCCCGCCAAACCGAACAAGTGC  
GGCGTCTGTTCTCTCGTCAATGGCGGCTGGTTTTCCAGCAAGGCGACGCCGATGATGGAG  
ACCGTTCAACCGGATCGCTACCAGCCGTTTCTCGATCGCGGCTACACGGTCTTTGCCGTG  
GTCACCAAGTCCAGCCTGTATTACGATTCGGACCTCATGCAAGACGTGCAGCGCGCC  
GTCCGTTTTATACGGCACAATGCCCGGAGGTTGGAGTTGATCCGAATCGACTCGGAGTG  
ACCGGCGCAAGTTCGGCGGCCAACTTTCTTGACGATCGCAACGCAAGCGGCCCGAGGC  
AAAGCCGACTCGCCCGATCCGGTCGAGCGTAAAAGCAGCGCCGTCAGGCCGTGCCTGC  
TTCTTCCCGCCGACCGATTTCTGAACTATGGCGGCCCGGCGTGCATGGCGTGGGCCGC  
GGCCCGTTGGAGCCATCAAGGCGGCATTCCGTTCCCGCGCCAGACGCTCGAAGGGCGC  
CATGCCCTCGGCAAGGAAATATCGCCGATCTATTACGTCTCCGCGAAGCTGCCGCCGACG  
CTGATCGTTCACGGCGATGCCGACAACGTCTGTCCTTTCCAGCAAGCCGAGAGTTTTATG  
AAACGGGCCAAAGAGGCGCGCAAAGGACCTTCAACTCATCGTGCCTCCCGCAAGGGA  
CACGGCTGGGGCGATTTCTGAAATCCGCCGAAGACGTCAACGCATTCCGCGACTGGTTC  
GACAAGTTCCTACCCCAACAAACCAAGTAG

**LAE4 protein sequence**

MRHSISLVFLVALAALPWACLAEDDKAPDVRRTEDVIYGRKSGMALTMDVFPQPAKPNKC  
GVVFLVNGGWSSKATPMMETVQPDYQPFVLDGRYTVFAVVTSSQPVFTIPDLMQDVQRA  
VRFIRHNAARFVDPNRLGVTGASSGGQLSLTIATQGGPGKADSPDVERESSAVQAVAC



FFPPTDFLNYGGPGVDGVGRGPLEPIKAAFSGSRAQTLEGRHALGKEISPIYYVSAKLPTT  
LIVHGDADNVVFPQQAESFMKRAKEAGAKDLQLIVRPGKGGHGWDFWKS AEDVNAFADWF  
DKFLPQQTK

**LAE5 gene sequence**

ATGTATTTTCGCAGTGGCAGCAAGTTGGTCATCATCGGGCGACTCGATCACGGACGCGGGA  
CGGGACAAGGGGATCGCGGGCGAGGGGCTCTCAACGCCCATGGCAGCGGCTATGTGGCA  
TTGCTCAACGCCACCTCTTCGCCCGCTTCCCCGAACGGCGGCTGCGGCTCGTCAACCAG  
GGCAACAGCGGCAACACCGTGGCGGATCTGGCCCGCGCTGGCAAAACGATGTCTTCGGC  
CTGAAGCCCGACTATGTGGCGATGATGATCGGCATCAACGACGTCTGGCGCCAGTTCGAC  
CTCCCGTGTGATGACCGCCCATGTCTGCCCGAAGAGTACGAGAAGACCCCTCGACGAG  
TTGGTGGCGCGCACCGCCCGACGGTCAAGGGGATGATTCTGCTGACCCCTACTTCATC  
GAGCCTAACCGCGAGGACGCCATGCGCGCCCGCATGGACGTCTACGGCGACCTGATGCGC  
CGCGTCGCCGAGCGTCACGGCTGCCTGCTGGTTCGATGTCCAGGGAGCCTTCGACCGCTAT  
CTGCAACACTACCATCCGGCGCAGCTCGCCTGGGACCGCATCCACCCCAACCTCGCGGGC  
CACCAGGTCATCGCCAACGCCTTCTCGCGGCCACCGGCTGCCTGAATAGCTGA

**LAE5 protein sequence**

MYFAAGSKLVIIGDSITDAGRDKGIGGEGLFNAHSGSYVALLNAHLFARFPERRLRVNO  
GNSGNTVRDLAARWQNDVFLKPDYVAMMIGINDVWRQFDLPLMTRHVCPEEYKTLDE  
LVARTAPTVMKMI LTPYFIEPNREDAMRARMVYGLMRRVAERHGCLLVQVDFRY  
LQHYHPAQLAWDRIHPLAGHQVIANAF LAATGCLNS

**LAE6 gene sequence**

ATGCTGCTGCCCGAGACCCGCAACCTGCTCGACCTGATGGACGCCGCCACCAGGGGCGGC  
CGGCCCGGGCTGGAGACCCTGCCGCATGCCGTGGGGCGCAAGGCAGTCGACAAAATGTCTG  
GAGGATGGCGAGGCCGATCCGCGGAAGTGGCCGAGGTGGCGAACGGCGGCTTCGCGGGA  
CCGGCGAGCGAGATCCGGTTCGGCGCTACCGTCCGCTAGGTGAGGCGCGCGGGCTGCTG  
CCGACGCTGATCTACTATCACGGCGGGCGGCTTCGTGATCGGCAACATCGAGACGCATGAT  
TCGACCTGCCGGAGGCTCGCCAACAAAAGCCGCTGCCAGGTGATCTCGATCGACTACCGC  
CTGGCGCGGAGCATCCGTTCCCGGCGCCGATCGACGACGGGATCGCGGCGTTCGGCAT  
ATCCGCGACAACCGGAGTTCGTTCCGGCGCCGATGCCGCGCGCCTCGCGGTGGGCGGCGAT  
TCGGCGGGCGGCGCGATGGCGGCCGTGGTGTGCCAGGCCTGCCGCGACGCCGGCGAGACG  
GGGCCCGCGTTCAGATGCTGATCTATCCCGCGACGGACTCGAGCAGGGAGAGCGCCTCG  
CGCGTGGCCTTCGCCGAAGGCTACTTCTCAGCAAGGCGCTGATGGACTGGTTCGGGAG  
GCCTATGTGCCGGAGGACACCGACCTACCGACCTCCGCCTCTCACCCTCCTCGCCACG  
GACTTCACCGGACTCGCGCGGCTTCGTGCTACCGCGCGGTACGACCCGCTGCGCGAC  
GAGGGCCGCGCCTATGCCGACAGGCTGATCGAGCCGGCATCAAGACGACCTATGTGAAC  
TATCCCGGACCATCCACGGCTTCTTCTCGCTGACCGGATTCTGAGCCAGGGACTGAAA  
GCCAACGACGAGGCGGCGGGTGTATGGGGCGCACTTCGGGACGTAG

**LAE6 protein sequence**

MLLPETRNLLDLMDAATRGRPRLETLPHAVGRKAVDKMSEEDGEADPPEVAEVANGGFAG  
PASEIRFRRYRPLGEAAGLLPTLIYYHGGGFVIGNIETHDSTCRRLANKSRCQVISIDYR  
LAPEHPFPAPIDGIAAFRHIRDNAESFGADAARLAVGGDSAGGAMA AVVCQACRDAGET  
GPAFQMLIYPATDSSRESASRVFAEGYFLSKALMDWFW EAYVPEDTDLTDLRLSPLLAT  
DFTGLPPAFVLTAGYDPLRDEGRAYADRLIEAGIKTTYVNYPGTIHGFFSLTRFLSQGLK  
ANDEAAAVMGAHFGT

**LAE7 gene sequence**

ATGCATTTCTTCGATCACGGTGGCGTACTCGCAACTTCATGCTCGTGGCGCTGCTCGCC  
GGCAGTGGCGCGCGCATGCCAAGCCCTGCGCGCTCTCGCGCACAAAGCGGCCCTGTG  
CCCGCGCGGTCGCCGCGCAGTGGCGATTCCGCGTCCCACGGCTGCCGAGGTTCGAGCTC  
CGCGCGCGGACTCGCGAAGTTCCTTGCCCTCGCCGATGCTGCCACGCGCAGCGTGCTC  
GAGAAATATCCCGGGTCTCGAAGTGGCGCCACCGGGGCCGAACAGCGCGATCCTGCCG  
GGCTTGGCACCGCAGTTCAGGGCGAAACACCAGGGCGAACCTCGAAGTCGCTCGCCAAGGC  
GACGCCGAAGTGTGTTCATGGGCGACTCGATCACCGATTTCTGGCGCAACGCCGAAGGT  
CCGTTTCGAGGCAAGCCCGTCTCGACCGGCATTCGGGCACTGGAAGGTGGCGAAGTTC  
GGTATCGCCGGCGACACGACGCAGGGCGTTCCTATCGGCTGCAGAACGGCGAGGGGCGC

GGTTTCAACCCGCGCGCCGTGATGTTGATGATCGGCACGAACAACACGGCCAGGAACACG  
GCGGCCGAGATCGCCGAAGGCATCGGCGCCGTCGTGCTCGAGCTGCAGCGCGATTTTCCG  
CAAGCGAAGATTCTGCTGCTCGGCGTATTTCCGCGCGGCCGCGCCGAACGATCCGGTCCGC  
GGCACGATTGCCGAGATCAACCGCGCGATCGCGAAGCTTCACGACGGCGACCGCGTCCAC  
TATCTCGACATCGGCGCGCAATTCCTCGCTGCCGACGGCAGCATTCCGGCCGACGTCATG  
AGCGATCTGCTGCACCCCGGCCGAAGGGCTACGAGATCTGGGCGCAGGCCGTCAAGGAG  
CCGTTGACGAAGCTGATGGGCGCGCTCCTTAG

**LAE7 protein sequence**

MHFFDHGRVTRNFMLVALLAGSAGAHAQALRAPAAQAAPVPAAVPAVAI PRPTAAEVEL  
ARGSLAKFLASADAATRSVLEKYPGLLEVRPPGPN SAILPGLAPQFQAKHQANLEVARQG  
DAEVLFMGDSITDFWRNAEGPFAGKPVLD RHFHGWKVANFGIAGDTTQGVLYRLQNGEGR  
GFNPRAVMLMIGTNN TARNTAAEIAEGIGAVVLELQRDFPQAKILL LGVFPRGRPNDPVR  
GTIAEINRAIAKLHDGDRVHYLDIGAQFLAADGSIPADVMSDLLHPGPKGYEIWAQAVKE  
PLTKLMGARP
